# Supplementary material for: Gene Expression and Missplicing in the Corneal Endothelium of Patients With a TCF4 Trinucleotide Repeat Expansion Without Fuchs' Endothelial Corneal Dystrophy
Source: PubMed Central journal article supplement — Invest Ophthalmol Vis Sci. 2019 Aug;60(10):3636–43. doi: 10.1167/iovs.19-27689 (PMC6716950; doi:10.1167/iovs.19-27689), 2019-08
Supplement: iovs-60-10-11_s02.pdf [file iovs-60-10-11_s02.pdf]

Supplementary Table 2. Genes with decreased expression in RE+/FECD+ compared to RE+/FECD-

| Gene Name | Log2FC | P value  | FDR      |            |        |          |          |
|-----------|--------|----------|----------|------------|--------|----------|----------|
| A2M       | -2.600 | 1.22E-03 | 5.44E-03 | ANGPT1     | -3.628 | 7.72E-06 | 1.54E-04 |
| AADAT     | -6.694 | 2.45E-07 | 1.99E-05 | ANKRD1     | -4.437 | 1.73E-03 | 7.10E-03 |
| ABCA1     | -2.375 | 6.20E-05 | 6.07E-04 | ANKRD34B   | -7.107 | 6.18E-07 | 3.24E-05 |
| ABCB4     | -2.283 | 2.59E-03 | 9.72E-03 | ANKRD36BP2 | -2.247 | 1.15E-02 | 3.17E-02 |
| ABCC3     | -2.753 | 5.08E-04 | 2.81E-03 | ANO4       | -3.398 | 3.69E-03 | 1.28E-02 |
| ABCC4     | -2.924 | 8.04E-05 | 7.26E-04 | ANXA2      | -2.182 | 2.76E-07 | 2.15E-05 |
| ABI3      | -2.664 | 4.96E-03 | 1.62E-02 | ANXA2P2    | -2.206 | 3.34E-07 | 2.34E-05 |
| ABTB2     | -2.248 | 6.32E-03 | 1.96E-02 | ANXA8      | -5.197 | 7.33E-05 | 6.82E-04 |
| ACE       | -2.610 | 6.84E-03 | 2.09E-02 | ANXA8L1    | -5.193 | 7.40E-05 | 6.87E-04 |
| ACE2      | -2.110 | 1.84E-02 | 4.63E-02 | ANXA8L2    | -5.796 | 2.58E-06 | 7.61E-05 |
| ACPP      | -2.859 | 1.55E-03 | 6.54E-03 | AOAH       | -2.852 | 4.38E-03 | 1.47E-02 |
| ACSL5     | -3.310 | 1.55E-04 | 1.16E-03 | APBA2      | -2.086 | 4.29E-03 | 1.44E-02 |
| ACTA2     | -4.214 | 3.48E-05 | 4.06E-04 | APBB1IP    | -3.517 | 6.20E-05 | 6.07E-04 |
| ACTBL2    | -7.564 | 8.94E-03 | 2.59E-02 | APOB       | -3.123 | 2.19E-05 | 2.96E-04 |
| ACTC1     | -4.424 | 9.59E-04 | 4.52E-03 | APOBEC3A   | -2.796 | 1.93E-03 | 7.71E-03 |
| ACTN2     | -2.769 | 4.57E-03 | 1.52E-02 | APOC1      | -2.854 | 1.93E-04 | 1.36E-03 |
| ADAM19    | -2.135 | 9.30E-04 | 4.41E-03 | APOL6      | -2.570 | 8.14E-03 | 2.39E-02 |
| ADAM22    | -3.299 | 1.48E-07 | 1.57E-05 | AQP9       | -3.818 | 4.83E-04 | 2.69E-03 |
| ADAM23    | -2.196 | 6.35E-03 | 1.97E-02 | ARAP2      | -2.981 | 1.29E-03 | 5.68E-03 |
| ADAM28    | -2.793 | 1.39E-06 | 5.21E-05 | ARHGAP15   | -3.308 | 1.64E-03 | 6.82E-03 |
| ADAMTS10  | -3.395 | 1.29E-04 | 1.01E-03 | ARHGAP22   | -2.031 | 1.24E-05 | 2.07E-04 |
| ADAMTS16  | -3.770 | 1.30E-03 | 5.70E-03 | ARHGAP25   | -3.036 | 6.39E-04 | 3.32E-03 |
| ADAMTS19  | -6.479 | 1.07E-04 | 8.85E-04 | ARHGAP28   | -2.378 | 1.00E-03 | 4.68E-03 |
| ADAMTS2   | -2.809 | 1.13E-04 | 9.16E-04 | ARHGAP30   | -2.957 | 2.96E-03 | 1.08E-02 |
| ADAMTS6   | -2.993 | 7.93E-09 | 5.31E-06 | ARHGAP9    | -2.531 | 2.99E-04 | 1.89E-03 |
| ADAMTSL1  | -6.789 | 4.61E-06 | 1.12E-04 | ARID3A     | -2.004 | 2.91E-04 | 1.85E-03 |
| ADAMTSL3  | -2.713 | 6.48E-04 | 3.36E-03 | ARID5A     | -3.145 | 9.06E-04 | 4.32E-03 |
| ADAP2     | -2.488 | 6.60E-04 | 3.40E-03 | ARL4A      | -3.118 | 1.04E-08 | 5.31E-06 |
| ADCY5     | -2.145 | 3.71E-03 | 1.28E-02 | ARMC4      | -2.795 | 5.51E-04 | 2.98E-03 |
| ADH1B     | -3.161 | 1.42E-02 | 3.75E-02 | ARNTL2     | -3.022 | 7.36E-04 | 3.69E-03 |
| ADORA3    | -3.301 | 2.68E-05 | 3.39E-04 | ARSI       | -3.111 | 5.04E-04 | 2.79E-03 |
| AFAP1-AS1 | -2.469 | 1.29E-02 | 3.48E-02 | ASB2       | -4.308 | 2.73E-03 | 1.01E-02 |
| AFP       | -3.249 | 2.71E-03 | 1.01E-02 | ASCC3      | -2.066 | 9.23E-11 | 9.41E-07 |
| AGAP2     | -3.221 | 5.73E-03 | 1.81E-02 | ASPHD1     | -2.618 | 2.00E-03 | 7.96E-03 |
| AGPAT9    | -3.422 | 2.08E-03 | 8.21E-03 | ASPM       | -2.477 | 1.76E-04 | 1.27E-03 |
| AGTR2     | -4.572 | 2.33E-04 | 1.57E-03 | ASXL3      | -4.951 | 3.49E-04 | 2.12E-03 |
| AHNAK2    | -2.943 | 3.49E-08 | 7.92E-06 | ATF3       | -3.839 | 2.90E-03 | 1.06E-02 |
| AIM1      | -2.770 | 1.59E-03 | 6.67E-03 | ATP10A     | -6.027 | 8.09E-06 | 1.59E-04 |
| AKAP2     | -2.876 | 1.07E-04 | 8.84E-04 | ATP8B4     | -3.097 | 6.02E-07 | 3.21E-05 |
| ALDH1B1   | -2.332 | 1.24E-04 | 9.87E-04 | B2M        | -2.190 | 2.41E-04 | 1.60E-03 |
| ALDH1L2   | -3.141 | 5.33E-05 | 5.47E-04 | B3GALT2    | -4.041 | 3.59E-03 | 1.25E-02 |
| ALOX5     | -3.339 | 2.14E-04 | 1.47E-03 | B3GALT5    | -2.386 | 3.38E-04 | 2.07E-03 |
| ALOX5AP   | -3.774 | 7.25E-05 | 6.78E-04 | B3GNT5     | -2.268 | 1.42E-05 | 2.24E-04 |
| ALPK2     | -3.730 | 4.23E-04 | 2.43E-03 | BAALC      | -4.744 | 1.09E-03 | 5.00E-03 |
| ALPL      | -2.811 | 1.56E-02 | 4.04E-02 | BACH2      | -3.726 | 4.65E-03 | 1.54E-02 |
| AMICA1    | -2.840 | 3.30E-03 | 1.17E-02 | BAI3       | -2.834 | 7.44E-03 | 2.23E-02 |
|           |        |          |          | BAIAP2L1   | -2.424 | 5.98E-08 | 9.47E-06 |
|           |        |          |          | BANK1      | -2.316 | 9.16E-05 | 7.93E-04 |
|           |        |          |          | BCAT1      | -3.096 | 1.22E-04 | 9.76E-04 |
|           |        |          |          | BCHE       | -5.821 | 9.03E-06 | 1.70E-04 |
|           |        |          |          | BCL2A1     | -3.986 | 5.86E-03 | 1.84E-02 |
|           |        |          |          | BCL2L14    | -5.646 | 5.76E-04 | 3.08E-03 |

|           |        |          |          |                |        |          |          |
|-----------|--------|----------|----------|----------------|--------|----------|----------|
| BDKRB1    | -2.315 | 1.32E-04 | 1.03E-03 | C7orf57        | -3.217 | 2.89E-03 | 1.06E-02 |
| BEND6     | -2.928 | 7.11E-04 | 3.60E-03 | C8orf31        | -3.212 | 1.10E-03 | 5.02E-03 |
| BICC1     | -2.043 | 4.32E-03 | 1.45E-02 | C8orf84        | -4.091 | 2.00E-02 | 4.95E-02 |
| BID       | -2.604 | 2.23E-07 | 1.94E-05 | C8orf85        | -2.848 | 7.03E-03 | 2.14E-02 |
| BIN2      | -3.031 | 2.33E-03 | 8.94E-03 | C9orf4         | -3.791 | 6.19E-04 | 3.25E-03 |
| BLM       | -2.477 | 4.25E-06 | 1.06E-04 | CABP4          | -2.503 | 6.50E-03 | 2.01E-02 |
| BLNK      | -3.082 | 8.71E-05 | 7.67E-04 | CABP7          | -3.446 | 1.77E-03 | 7.23E-03 |
| BMP2      | -3.167 | 1.78E-02 | 4.50E-02 | CABYR          | -2.651 | 9.64E-04 | 4.54E-03 |
| BMP4      | -4.196 | 8.61E-05 | 7.59E-04 | CALCR          | -3.364 | 9.10E-03 | 2.63E-02 |
| BMP6      | -4.925 | 6.27E-05 | 6.11E-04 | CALU           | -2.177 | 1.08E-06 | 4.49E-05 |
| BNC1      | -2.255 | 8.63E-03 | 2.51E-02 | CAMK4          | -6.754 | 8.14E-03 | 2.39E-02 |
| BRIP1     | -2.526 | 4.48E-06 | 1.09E-04 | CAPG           | -2.258 | 8.29E-06 | 1.62E-04 |
| BST2      | -2.713 | 1.43E-03 | 6.16E-03 | CARD11         | -3.007 | 2.79E-03 | 1.03E-02 |
| BTBD11    | -2.079 | 3.68E-04 | 2.20E-03 | CARD16         | -2.996 | 1.70E-03 | 7.03E-03 |
| BTG2      | -2.462 | 8.97E-06 | 1.69E-04 | CARD17         | -2.837 | 2.22E-03 | 8.62E-03 |
| BTK       | -3.497 | 7.17E-05 | 6.71E-04 | CARD6          | -3.023 | 6.31E-06 | 1.35E-04 |
| BVES      | -2.625 | 1.25E-02 | 3.40E-02 | CASP1          | -3.068 | 8.34E-04 | 4.05E-03 |
| C10orf55  | -4.009 | 3.37E-03 | 1.19E-02 | CASS4          | -2.888 | 6.33E-04 | 3.31E-03 |
| C11orf41  | -2.546 | 1.09E-02 | 3.02E-02 | CCDC169        | -2.154 | 1.90E-02 | 4.75E-02 |
| C11orf80  | -2.806 | 1.27E-07 | 1.45E-05 | CCDC169-SOHLH2 | -2.168 | 4.67E-03 | 1.54E-02 |
| C12orf59  | -4.100 | 6.35E-04 | 3.31E-03 | CCDC19         | -2.370 | 7.95E-06 | 1.58E-04 |
| C12orf70  | -2.968 | 1.33E-02 | 3.56E-02 | CCDC80         | -2.593 | 9.04E-07 | 4.01E-05 |
| C12orf75  | -3.537 | 3.23E-07 | 2.29E-05 | CCIN           | -3.327 | 4.08E-03 | 1.38E-02 |
| C13orf33  | -2.291 | 1.46E-02 | 3.84E-02 | CCL20          | -3.759 | 4.35E-03 | 1.46E-02 |
| C15orf59  | -2.774 | 1.91E-05 | 2.74E-04 | CCL3L1         | -5.593 | 2.55E-03 | 9.62E-03 |
| C17orf67  | -2.903 | 6.05E-07 | 3.21E-05 | CCL3L3         | -5.593 | 2.55E-03 | 9.62E-03 |
| C18orf56  | -2.634 | 2.21E-03 | 8.59E-03 | CCL4           | -4.305 | 1.61E-02 | 4.16E-02 |
| C19orf21  | -3.669 | 1.42E-04 | 1.09E-03 | CCND1          | -2.871 | 3.87E-04 | 2.28E-03 |
| C19orf33  | -2.753 | 3.17E-05 | 3.80E-04 | CCND2          | -2.435 | 2.12E-03 | 8.33E-03 |
| C19orf38  | -2.781 | 3.23E-04 | 2.00E-03 | CCNE2          | -2.422 | 8.00E-03 | 2.36E-02 |
| C1orf162  | -2.536 | 3.69E-06 | 9.61E-05 | CCR1           | -3.497 | 2.38E-04 | 1.59E-03 |
| C1orf168  | -3.911 | 3.20E-04 | 1.98E-03 | CCR2           | -3.867 | 2.06E-03 | 8.15E-03 |
| C1orf38   | -2.941 | 9.07E-04 | 4.32E-03 | CCR5           | -3.120 | 2.70E-03 | 1.00E-02 |
| C1QA      | -2.643 | 1.30E-02 | 3.49E-02 | CCRL1          | -4.788 | 2.35E-07 | 1.97E-05 |
| C1QB      | -2.899 | 4.79E-03 | 1.57E-02 | CD109          | -3.536 | 1.13E-07 | 1.39E-05 |
| C1QC      | -2.754 | 7.63E-03 | 2.28E-02 | CD14           | -2.360 | 3.72E-04 | 2.22E-03 |
| C1QTNF7   | -3.683 | 3.46E-06 | 9.21E-05 | CD163          | -2.905 | 4.57E-03 | 1.52E-02 |
| C20orf197 | -2.786 | 1.49E-03 | 6.33E-03 | CD163L1        | -2.092 | 2.67E-03 | 9.98E-03 |
| C21orf88  | -2.557 | 3.57E-04 | 2.15E-03 | CD180          | -3.382 | 7.01E-04 | 3.56E-03 |
| C2orf27A  | -2.201 | 1.93E-03 | 7.73E-03 | CD1C           | -4.514 | 1.81E-03 | 7.36E-03 |
| C2orf91   | -3.610 | 4.69E-03 | 1.55E-02 | CD200R1        | -2.250 | 2.11E-04 | 1.45E-03 |
| C3        | -2.794 | 2.03E-03 | 8.06E-03 | CD226          | -2.825 | 1.88E-05 | 2.71E-04 |
| C3AR1     | -3.367 | 8.72E-04 | 4.20E-03 | CD28           | -2.435 | 1.68E-02 | 4.30E-02 |
| C3orf70   | -3.718 | 2.17E-05 | 2.95E-04 | CD300E         | -3.118 | 2.12E-03 | 8.31E-03 |
| C4BPB     | -4.686 | 9.45E-04 | 4.47E-03 | CD300LB        | -3.830 | 5.43E-03 | 1.74E-02 |
| C4orf26   | -6.123 | 4.33E-05 | 4.70E-04 | CD33           | -2.887 | 3.22E-03 | 1.15E-02 |
| C5AR1     | -2.795 | 2.70E-03 | 1.01E-02 | CD37           | -2.543 | 1.60E-03 | 6.68E-03 |
| C5orf46   | -3.844 | 8.83E-04 | 4.24E-03 | CD3D           | -4.527 | 1.08E-02 | 3.00E-02 |
| C6orf132  | -3.113 | 1.64E-05 | 2.47E-04 | CD4            | -2.254 | 1.37E-03 | 5.96E-03 |
| C6orf174  | -2.252 | 4.99E-03 | 1.62E-02 | CD44           | -3.717 | 6.17E-05 | 6.06E-04 |
| C6orf97   | -2.191 | 1.17E-04 | 9.42E-04 | CD53           | -3.241 | 1.26E-03 | 5.57E-03 |
| C6orf99   | -2.712 | 7.86E-03 | 2.33E-02 | CD55           | -2.156 | 1.89E-05 | 2.72E-04 |

|            |        |          |          |            |        |          |          |
|------------|--------|----------|----------|------------|--------|----------|----------|
| CD6        | -4.097 | 1.19E-02 | 3.26E-02 | CNN1       | -2.023 | 8.27E-03 | 2.42E-02 |
| CD68       | -2.877 | 4.35E-04 | 2.49E-03 | CNTNAP2    | -5.025 | 1.17E-03 | 5.27E-03 |
| CD69       | -3.924 | 1.35E-03 | 5.87E-03 | COBLL1     | -3.727 | 5.84E-03 | 1.84E-02 |
| CD74       | -2.285 | 1.65E-03 | 6.84E-03 | COL10A1    | -7.565 | 4.94E-07 | 2.94E-05 |
| CD79B      | -6.020 | 1.62E-03 | 6.77E-03 | COL11A1    | -6.145 | 1.00E-06 | 4.29E-05 |
| CD84       | -3.261 | 8.42E-05 | 7.47E-04 | COL13A1    | -3.931 | 3.42E-04 | 2.09E-03 |
| CD86       | -3.551 | 3.45E-04 | 2.10E-03 | COL16A1    | -3.820 | 4.73E-06 | 1.13E-04 |
| CD93       | -2.824 | 8.79E-04 | 4.23E-03 | COL18A1    | -2.562 | 1.67E-04 | 1.22E-03 |
| CDA        | -3.867 | 1.07E-02 | 2.99E-02 | COL1A1     | -3.218 | 1.33E-05 | 2.16E-04 |
| CDCA5      | -2.614 | 2.84E-03 | 1.05E-02 | COL23A1    | -3.137 | 2.11E-03 | 8.29E-03 |
| CDCP1      | -2.543 | 1.81E-02 | 4.56E-02 | COL3A1     | -2.414 | 8.54E-05 | 7.54E-04 |
| CDH10      | -8.298 | 7.08E-08 | 1.05E-05 | COL4A1     | -2.963 | 1.12E-05 | 1.95E-04 |
| CDH13      | -2.734 | 1.28E-02 | 3.44E-02 | COL4A2     | -2.358 | 1.84E-04 | 1.31E-03 |
| CDH6       | -5.110 | 3.40E-05 | 3.99E-04 | COL5A1     | -2.582 | 3.54E-05 | 4.10E-04 |
| CDH8       | -5.611 | 1.25E-04 | 9.92E-04 | COL6A1     | -2.046 | 4.26E-08 | 8.35E-06 |
| CDK1       | -2.974 | 1.47E-05 | 2.30E-04 | COL6A2     | -2.926 | 1.08E-05 | 1.90E-04 |
| CDKL1      | -3.727 | 2.46E-08 | 7.08E-06 | COL6A6     | -4.161 | 6.22E-05 | 6.08E-04 |
| CDKN1A     | -2.834 | 5.94E-08 | 9.47E-06 | CORO1A     | -3.271 | 4.58E-05 | 4.91E-04 |
| CDKN2A     | -4.076 | 2.50E-05 | 3.24E-04 | CPA4       | -6.108 | 2.27E-07 | 1.95E-05 |
| CDKN2B     | -3.527 | 8.96E-06 | 1.69E-04 | CPE        | -2.670 | 1.06E-02 | 2.97E-02 |
| CDKN2B-AS1 | -3.076 | 2.42E-03 | 9.23E-03 | CPEB2      | -2.463 | 2.25E-08 | 6.97E-06 |
| CDKN3      | -4.465 | 2.18E-04 | 1.49E-03 | CPXM1      | -3.041 | 1.72E-03 | 7.08E-03 |
| CEACAM21   | -4.275 | 1.42E-02 | 3.76E-02 | CPZ        | -3.339 | 2.86E-03 | 1.05E-02 |
| CEBPA      | -2.885 | 3.65E-03 | 1.27E-02 | CRHBP      | -5.073 | 1.10E-04 | 9.01E-04 |
| CECR6      | -2.760 | 1.54E-03 | 6.51E-03 | CRISPLD1   | -4.941 | 1.14E-08 | 5.46E-06 |
| CELF2      | -2.143 | 2.72E-06 | 7.92E-05 | CRLF1      | -2.074 | 1.36E-02 | 3.63E-02 |
| CELSR1     | -2.362 | 4.21E-04 | 2.43E-03 | CRTAM      | -4.174 | 5.37E-03 | 1.72E-02 |
| CENPV      | -2.020 | 2.12E-05 | 2.92E-04 | CRYGN      | -3.652 | 4.67E-03 | 1.54E-02 |
| CEP55      | -4.116 | 8.49E-06 | 1.65E-04 | CSF1R      | -2.722 | 4.46E-03 | 1.49E-02 |
| CES1       | -3.081 | 2.02E-02 | 4.98E-02 | CSF2RB     | -3.176 | 3.06E-03 | 1.11E-02 |
| CFTR       | -2.809 | 6.69E-03 | 2.05E-02 | CSF3R      | -3.306 | 2.61E-05 | 3.34E-04 |
| CHI3L2     | -3.007 | 1.08E-03 | 4.95E-03 | CSGALNACT2 | -2.031 | 3.87E-08 | 8.08E-06 |
| CHN2       | -3.098 | 3.16E-08 | 7.77E-06 | CSN3       | -7.400 | 1.69E-05 | 2.53E-04 |
| CHRNA6     | -3.508 | 2.36E-03 | 9.03E-03 | CSRP2      | -2.765 | 6.61E-08 | 9.99E-06 |
| CHST11     | -2.685 | 1.64E-03 | 6.83E-03 | CST7       | -3.724 | 1.66E-02 | 4.25E-02 |
| CHST2      | -2.912 | 1.58E-05 | 2.40E-04 | CSTA       | -4.011 | 2.96E-05 | 3.65E-04 |
| CIITA      | -2.691 | 9.79E-03 | 2.78E-02 | CTHRC1     | -4.676 | 1.41E-05 | 2.24E-04 |
| CKAP2L     | -3.203 | 1.05E-02 | 2.94E-02 | CTLA4      | -3.897 | 1.37E-02 | 3.65E-02 |
| CLCF1      | -2.792 | 2.54E-05 | 3.27E-04 | CTNND2     | -5.231 | 2.04E-05 | 2.86E-04 |
| CLEC10A    | -3.314 | 5.84E-03 | 1.84E-02 | CTSS       | -3.179 | 1.98E-04 | 1.39E-03 |
| CLEC12A    | -3.068 | 4.79E-03 | 1.57E-02 | CTTNBP2    | -2.877 | 1.59E-04 | 1.18E-03 |
| CLEC12B    | -3.784 | 1.70E-03 | 7.02E-03 | CX3CR1     | -3.154 | 9.78E-04 | 4.59E-03 |
| CLEC18B    | -2.045 | 1.35E-02 | 3.62E-02 | CXCR1      | -4.768 | 3.78E-03 | 1.30E-02 |
| CLEC2B     | -3.400 | 2.12E-04 | 1.46E-03 | CXCR2      | -2.597 | 1.01E-02 | 2.86E-02 |
| CLEC4D     | -3.336 | 1.61E-02 | 4.16E-02 | CXorf21    | -3.635 | 5.66E-04 | 3.04E-03 |
| CLEC5A     | -4.012 | 7.34E-05 | 6.83E-04 | CYBB       | -3.340 | 7.10E-04 | 3.59E-03 |
| CLEC7A     | -3.090 | 6.89E-04 | 3.51E-03 | CYP19A1    | -7.048 | 5.63E-03 | 1.79E-02 |
| CLEC9A     | -3.282 | 9.72E-03 | 2.77E-02 | CYP24A1    | -3.455 | 1.22E-02 | 3.31E-02 |
| CLIC4      | -2.556 | 5.94E-06 | 1.30E-04 | CYSLTR1    | -3.857 | 1.78E-04 | 1.28E-03 |
| CLMP       | -5.264 | 1.25E-05 | 2.08E-04 | CYSLTR2    | -2.628 | 1.42E-02 | 3.74E-02 |
| CMKLR1     | -2.699 | 8.16E-03 | 2.40E-02 | CYTH4      | -2.893 | 5.31E-03 | 1.71E-02 |
| CMTM2      | -3.220 | 1.50E-02 | 3.92E-02 | CYTIP      | -3.229 | 1.04E-02 | 2.92E-02 |

|         |        |          |          |         |        |          |          |
|---------|--------|----------|----------|---------|--------|----------|----------|
| D4S234E | -4.356 | 1.16E-06 | 4.62E-05 | EMB     | -4.133 | 1.22E-05 | 2.05E-04 |
| DAAM1   | -2.160 | 4.35E-08 | 8.46E-06 | EMBP1   | -2.886 | 5.31E-06 | 1.22E-04 |
| DACT1   | -2.774 | 6.61E-04 | 3.40E-03 | EMR2    | -2.808 | 1.26E-04 | 9.95E-04 |
| DACT2   | -4.150 | 1.18E-02 | 3.23E-02 | EMR3    | -4.574 | 3.16E-03 | 1.13E-02 |
| DAPP1   | -3.357 | 5.89E-04 | 3.13E-03 | EMR4P   | -2.868 | 4.36E-03 | 1.46E-02 |
| DCBLD1  | -3.084 | 1.79E-06 | 6.09E-05 | ENC1    | -3.875 | 4.68E-06 | 1.12E-04 |
| DCBLD2  | -2.503 | 1.64E-06 | 5.79E-05 | ENPP2   | -3.267 | 5.73E-03 | 1.81E-02 |
| DCDC2   | -2.416 | 3.07E-04 | 1.92E-03 | ENTPD1  | -3.180 | 1.03E-05 | 1.84E-04 |
| DCLK1   | -2.946 | 1.98E-04 | 1.39E-03 | EPB41L3 | -2.748 | 3.83E-03 | 1.32E-02 |
| DCX     | -3.715 | 1.13E-04 | 9.17E-04 | EPHB2   | -3.416 | 6.60E-04 | 3.40E-03 |
| DDIT4L  | -2.185 | 2.89E-06 | 8.21E-05 | EPHB6   | -2.140 | 3.70E-04 | 2.21E-03 |
| DEPDC7  | -4.454 | 1.01E-06 | 4.33E-05 | EPS8    | -2.861 | 9.68E-09 | 5.31E-06 |
| DGKI    | -4.455 | 6.09E-07 | 3.21E-05 | ERMN    | -4.392 | 7.36E-03 | 2.22E-02 |
| DIAPH3  | -3.355 | 2.80E-04 | 1.80E-03 | ESCO2   | -2.015 | 1.93E-02 | 4.81E-02 |
| DKK1    | -5.307 | 4.57E-04 | 2.59E-03 | ESM1    | -3.379 | 8.95E-04 | 4.28E-03 |
| DKK2    | -2.868 | 5.42E-05 | 5.52E-04 | ESR1    | -2.547 | 1.56E-02 | 4.04E-02 |
| DLC1    | -2.508 | 7.20E-06 | 1.47E-04 | ETV1    | -2.393 | 4.29E-05 | 4.66E-04 |
| DLEU1   | -2.945 | 1.22E-03 | 5.44E-03 | ETV7    | -3.040 | 1.84E-03 | 7.44E-03 |
| DLEU2   | -2.881 | 2.33E-04 | 1.57E-03 | EVI2A   | -3.414 | 8.28E-04 | 4.04E-03 |
| DLGAP5  | -3.045 | 4.95E-03 | 1.61E-02 | EVI2B   | -3.478 | 3.77E-04 | 2.24E-03 |
| DLK1    | -5.199 | 6.86E-04 | 3.50E-03 | EXO1    | -2.457 | 5.82E-04 | 3.11E-03 |
| DMD     | -2.975 | 1.46E-03 | 6.24E-03 | EXOSC4  | -3.601 | 2.37E-03 | 9.09E-03 |
| DMRTA1  | -4.942 | 2.52E-05 | 3.26E-04 | EYA1    | -2.357 | 5.46E-05 | 5.55E-04 |
| DOCK10  | -3.189 | 3.15E-05 | 3.79E-04 | F2R     | -2.498 | 9.65E-03 | 2.75E-02 |
| DOCK2   | -3.039 | 2.83E-03 | 1.04E-02 | F2RL1   | -2.621 | 1.68E-03 | 6.96E-03 |
| DOCK4   | -3.084 | 2.07E-04 | 1.43E-03 | F2RL2   | -3.956 | 2.54E-05 | 3.27E-04 |
| DOCK8   | -2.196 | 6.01E-07 | 3.21E-05 | F3      | -2.759 | 1.92E-04 | 1.35E-03 |
| DPP10   | -2.310 | 7.99E-03 | 2.36E-02 | FABP4   | -4.421 | 1.35E-03 | 5.86E-03 |
| DPP4    | -4.127 | 1.07E-02 | 3.00E-02 | FABP5   | -2.410 | 8.72E-05 | 7.67E-04 |
| DRAM1   | -3.272 | 5.05E-05 | 5.27E-04 | FAM101A | -4.152 | 3.45E-03 | 1.21E-02 |
| DSC2    | -2.054 | 1.13E-03 | 5.12E-03 | FAM105A | -3.404 | 1.63E-05 | 2.46E-04 |
| DSCAM   | -4.378 | 3.49E-03 | 1.23E-02 | FAM111B | -3.359 | 6.35E-04 | 3.31E-03 |
| DSEL    | -2.703 | 1.16E-06 | 4.62E-05 | FAM124B | -2.568 | 4.41E-03 | 1.47E-02 |
| DSG2    | -2.468 | 1.02E-02 | 2.88E-02 | FAM129A | -2.769 | 4.84E-05 | 5.13E-04 |
| DSP     | -3.137 | 1.64E-04 | 1.20E-03 | FAM131B | -3.062 | 8.76E-05 | 7.69E-04 |
| DYNLT3  | -2.038 | 3.92E-06 | 1.01E-04 | FAM149A | -2.474 | 7.74E-03 | 2.30E-02 |
| DYSF    | -4.207 | 1.71E-05 | 2.54E-04 | FAM177B | -2.272 | 3.41E-03 | 1.20E-02 |
| E2F7    | -4.428 | 3.83E-04 | 2.26E-03 | FAM180A | -3.514 | 1.38E-03 | 5.97E-03 |
| ECE1    | -2.365 | 6.38E-04 | 3.32E-03 | FAM196A | -3.199 | 7.07E-03 | 2.15E-02 |
| ECM1    | -2.181 | 1.40E-03 | 6.04E-03 | FAM198B | -3.607 | 9.29E-05 | 8.01E-04 |
| ECRP    | -4.736 | 8.83E-04 | 4.24E-03 | FAM212B | -2.129 | 1.21E-05 | 2.04E-04 |
| EDIL3   | -5.837 | 2.73E-04 | 1.76E-03 | FAM26E  | -3.823 | 3.15E-05 | 3.78E-04 |
| EDN2    | -5.997 | 2.63E-05 | 3.35E-04 | FAM26F  | -2.346 | 1.99E-04 | 1.39E-03 |
| EEF1DP3 | -4.158 | 3.23E-03 | 1.15E-02 | FAM49A  | -2.614 | 6.99E-03 | 2.13E-02 |
| EFCAB10 | -4.999 | 9.88E-05 | 8.37E-04 | FAM64A  | -3.977 | 5.35E-03 | 1.72E-02 |
| EFNB2   | -5.071 | 3.24E-08 | 7.80E-06 | FAM70A  | -3.968 | 3.17E-04 | 1.97E-03 |
| EGR2    | -4.927 | 1.70E-02 | 4.35E-02 | FAM78A  | -2.069 | 1.20E-04 | 9.60E-04 |
| EGR3    | -5.175 | 9.16E-03 | 2.64E-02 | FAM81B  | -4.279 | 2.13E-03 | 8.35E-03 |
| EIF3IP1 | -3.307 | 1.75E-03 | 7.16E-03 | FAP     | -2.878 | 5.34E-07 | 3.07E-05 |
| ELMO1   | -2.408 | 3.87E-04 | 2.28E-03 | FAS     | -3.110 | 1.22E-07 | 1.45E-05 |
| ELN     | -4.609 | 1.46E-05 | 2.29E-04 | FBLN1   | -2.988 | 1.13E-04 | 9.19E-04 |
| ELTD1   | -4.487 | 1.06E-03 | 4.91E-03 | FBLN2   | -2.887 | 1.04E-02 | 2.93E-02 |

|          |        |          |          |               |        |          |          |
|----------|--------|----------|----------|---------------|--------|----------|----------|
| FBLN5    | -3.266 | 5.10E-08 | 9.23E-06 | FYN           | -2.569 | 3.81E-04 | 2.25E-03 |
| FBN1     | -2.815 | 9.27E-06 | 1.72E-04 | FZD10         | -3.334 | 1.32E-03 | 5.75E-03 |
| FBN2     | -5.309 | 4.02E-06 | 1.03E-04 | FZD6          | -2.261 | 1.03E-07 | 1.33E-05 |
| FCAR     | -4.052 | 3.72E-03 | 1.29E-02 | FZD8          | -3.368 | 8.81E-06 | 1.68E-04 |
| FCER1A   | -3.470 | 1.29E-04 | 1.01E-03 | GABRA5        | -9.320 | 3.49E-09 | 3.15E-06 |
| FCER1G   | -3.434 | 2.31E-05 | 3.07E-04 | GADD45A       | -2.575 | 5.47E-07 | 3.09E-05 |
| FCGR1A   | -3.401 | 1.00E-03 | 4.68E-03 | GAL3ST4       | -2.972 | 2.03E-04 | 1.41E-03 |
| FCGR1B   | -3.500 | 1.19E-03 | 5.34E-03 | GALNT1        | -3.109 | 3.29E-08 | 7.80E-06 |
| FCGR1C   | -3.457 | 1.28E-03 | 5.63E-03 | GAPT          | -3.640 | 3.90E-04 | 2.29E-03 |
| FCGR2A   | -3.515 | 8.79E-04 | 4.22E-03 | GAS7          | -2.747 | 3.56E-05 | 4.12E-04 |
| FCGR2B   | -3.113 | 1.59E-03 | 6.67E-03 | GATA2         | -2.438 | 2.96E-03 | 1.08E-02 |
| FCGR2C   | -2.950 | 4.59E-03 | 1.52E-02 | GATA6         | -4.057 | 1.22E-03 | 5.43E-03 |
| FCGR3A   | -3.602 | 4.48E-04 | 2.54E-03 | GBP1          | -2.686 | 4.44E-03 | 1.48E-02 |
| FCGR3B   | -3.617 | 6.62E-04 | 3.41E-03 | GBP2          | -2.680 | 9.53E-03 | 2.72E-02 |
| FERMT1   | -2.048 | 5.23E-03 | 1.69E-02 | GCNT1         | -4.276 | 2.36E-07 | 1.97E-05 |
| FERMT3   | -2.091 | 2.22E-04 | 1.51E-03 | GCNT2         | -2.763 | 9.21E-04 | 4.38E-03 |
| FETUB    | -7.393 | 1.15E-06 | 4.62E-05 | GCNT4         | -4.781 | 1.94E-05 | 2.77E-04 |
| FFAR2    | -3.533 | 1.40E-03 | 6.03E-03 | GDF15         | -2.057 | 1.40E-02 | 3.72E-02 |
| FGD2     | -2.396 | 2.38E-03 | 9.11E-03 | GDF7          | -2.780 | 2.61E-03 | 9.79E-03 |
| FGD4     | -2.800 | 1.83E-08 | 6.40E-06 | GDNF          | -6.557 | 1.20E-05 | 2.03E-04 |
| FGF1     | -5.028 | 1.41E-07 | 1.51E-05 | GEM           | -2.208 | 3.33E-05 | 3.92E-04 |
| FGL2     | -3.533 | 1.05E-03 | 4.85E-03 | GFPT2         | -2.013 | 1.49E-02 | 3.90E-02 |
| FGR      | -2.126 | 7.69E-03 | 2.29E-02 | GFRA1         | -3.903 | 1.62E-04 | 1.19E-03 |
| FHAD1    | -2.573 | 5.37E-04 | 2.92E-03 | GGH           | -2.035 | 5.51E-05 | 5.58E-04 |
| FHOD3    | -3.989 | 1.82E-05 | 2.64E-04 | GGTA1P        | -3.195 | 2.55E-03 | 9.60E-03 |
| FIBCD1   | -4.437 | 3.69E-04 | 2.21E-03 | GIMAP1        | -2.592 | 3.01E-03 | 1.09E-02 |
| FIBIN    | -2.267 | 1.19E-02 | 3.26E-02 | GIMAP1-GIMAP5 | -2.451 | 9.14E-03 | 2.64E-02 |
| FILIP1L  | -2.088 | 2.83E-03 | 1.04E-02 | GIMAP2        | -2.949 | 2.05E-05 | 2.86E-04 |
| FLJ13224 | -2.203 | 6.51E-03 | 2.01E-02 | GIMAP4        | -3.658 | 3.45E-04 | 2.11E-03 |
| FLJ16779 | -6.702 | 6.51E-06 | 1.38E-04 | GIMAP5        | -2.565 | 1.17E-02 | 3.22E-02 |
| FLJ31485 | -4.006 | 4.04E-04 | 2.35E-03 | GIMAP6        | -3.278 | 1.87E-03 | 7.56E-03 |
| FLJ35282 | -5.330 | 1.99E-05 | 2.81E-04 | GIMAP7        | -3.956 | 3.58E-04 | 2.16E-03 |
| FLJ44635 | -2.233 | 1.82E-04 | 1.30E-03 | GIMAP8        | -2.771 | 1.06E-02 | 2.96E-02 |
| FLNC     | -4.437 | 6.09E-08 | 9.47E-06 | GIPC2         | -2.239 | 1.22E-02 | 3.32E-02 |
| FLRT2    | -3.260 | 7.27E-05 | 6.79E-04 | GLDN          | -4.770 | 7.70E-03 | 2.29E-02 |
| FLT1     | -3.868 | 2.75E-05 | 3.45E-04 | GLI2          | -2.932 | 1.48E-06 | 5.42E-05 |
| FMN1     | -2.338 | 2.23E-05 | 3.01E-04 | GLIPR1        | -5.025 | 5.63E-08 | 9.47E-06 |
| FMNL1    | -2.481 | 5.59E-06 | 1.26E-04 | GLP2R         | -7.034 | 8.63E-05 | 7.61E-04 |
| FMNL2    | -2.048 | 2.22E-08 | 6.97E-06 | GMFG          | -3.114 | 3.16E-05 | 3.79E-04 |
| FMNL3    | -2.862 | 2.32E-04 | 1.57E-03 | GNA15         | -2.758 | 1.56E-03 | 6.57E-03 |
| FMOD     | -2.301 | 1.70E-04 | 1.24E-03 | GNAI1         | -3.606 | 6.45E-05 | 6.24E-04 |
| FNDC1    | -5.349 | 1.49E-06 | 5.46E-05 | GNB4          | -3.295 | 1.90E-04 | 1.34E-03 |
| FOXF2    | -2.633 | 1.56E-02 | 4.05E-02 | GNG2          | -3.658 | 8.46E-05 | 7.50E-04 |
| FOXL1    | -3.132 | 6.41E-05 | 6.22E-04 | GNGT2         | -3.291 | 2.73E-03 | 1.01E-02 |
| FPR1     | -3.446 | 7.14E-04 | 3.60E-03 | GPC3          | -2.605 | 1.34E-02 | 3.59E-02 |
| FPR2     | -3.611 | 1.16E-02 | 3.19E-02 | GPM6B         | -3.693 | 3.91E-04 | 2.29E-03 |
| FPR3     | -3.329 | 1.80E-03 | 7.32E-03 | GPR1          | -3.798 | 2.83E-05 | 3.53E-04 |
| FRAS1    | -2.453 | 1.31E-05 | 2.15E-04 | GPR114        | -2.529 | 1.35E-02 | 3.60E-02 |
| FSHR     | -8.986 | 1.52E-06 | 5.53E-05 | GPR126        | -2.976 | 5.12E-04 | 2.82E-03 |
| FST      | -4.339 | 8.09E-03 | 2.38E-02 | GPR132        | -2.756 | 3.65E-03 | 1.27E-02 |
| FXYD5    | -2.313 | 1.12E-02 | 3.10E-02 | GPR141        | -3.453 | 6.91E-03 | 2.11E-02 |
| FYB      | -3.236 | 2.71E-03 | 1.01E-02 | GPR160        | -2.004 | 1.33E-05 | 2.16E-04 |

|           |        |          |          |           |        |          |          |
|-----------|--------|----------|----------|-----------|--------|----------|----------|
| GPR176    | -2.960 | 4.36E-05 | 4.72E-04 | HIST1H2BI | -4.306 | 7.16E-06 | 1.46E-04 |
| GPR183    | -3.801 | 1.30E-03 | 5.70E-03 | HIST1H2BK | -3.080 | 1.17E-05 | 1.99E-04 |
| GPR34     | -3.478 | 3.07E-04 | 1.92E-03 | HIST1H2BM | -3.733 | 1.09E-03 | 5.01E-03 |
| GPR68     | -4.877 | 1.45E-02 | 3.82E-02 | HIST1H2BO | -3.982 | 6.57E-04 | 3.39E-03 |
| GPR77     | -3.278 | 4.22E-03 | 1.42E-02 | HIST1H3B  | -2.302 | 6.24E-04 | 3.27E-03 |
| GPR82     | -2.993 | 8.71E-04 | 4.20E-03 | HIST1H3F  | -2.713 | 1.58E-02 | 4.10E-02 |
| GPR85     | -4.610 | 1.02E-05 | 1.83E-04 | HIST1H3G  | -4.817 | 5.12E-04 | 2.82E-03 |
| GPR97     | -5.950 | 1.94E-04 | 1.36E-03 | HIST1H3H  | -2.332 | 1.81E-02 | 4.56E-02 |
| GPRC5B    | -2.087 | 1.82E-02 | 4.59E-02 | HIST1H3I  | -3.429 | 3.00E-03 | 1.09E-02 |
| GPRIN3    | -3.138 | 6.32E-03 | 1.96E-02 | HIST1H3J  | -3.476 | 5.92E-03 | 1.86E-02 |
| GP5M2     | -2.897 | 5.65E-03 | 1.79E-02 | HIST1H4F  | -3.509 | 2.19E-04 | 1.49E-03 |
| GPX1      | -2.426 | 3.74E-07 | 2.45E-05 | HIST1H4I  | -4.209 | 8.95E-06 | 1.69E-04 |
| GREB1L    | -4.871 | 2.68E-07 | 2.10E-05 | HIST1H4K  | -3.094 | 5.33E-03 | 1.71E-02 |
| GREM1     | -5.875 | 1.10E-03 | 5.03E-03 | HIST1H4L  | -3.959 | 7.64E-03 | 2.28E-02 |
| GREM2     | -7.013 | 2.81E-04 | 1.80E-03 | HK3       | -2.522 | 2.12E-03 | 8.31E-03 |
| GRIA3     | -3.483 | 3.05E-06 | 8.46E-05 | HLA-DQA1  | -3.316 | 5.03E-03 | 1.63E-02 |
| GRM5      | -3.285 | 3.94E-03 | 1.35E-02 | HLA-DRB5  | -3.778 | 1.28E-02 | 3.44E-02 |
| GRM8      | -3.919 | 1.27E-03 | 5.60E-03 | HLX       | -3.309 | 1.63E-03 | 6.81E-03 |
| GSG2      | -2.990 | 1.09E-02 | 3.04E-02 | HMCN1     | -5.333 | 3.19E-07 | 2.27E-05 |
| GSTA1     | -7.261 | 3.31E-07 | 2.32E-05 | HMGGA2    | -3.346 | 5.71E-03 | 1.81E-02 |
| GUCY1B3   | -3.772 | 7.06E-03 | 2.15E-02 | HMGB3     | -2.355 | 6.03E-06 | 1.32E-04 |
| GYPC      | -2.111 | 4.05E-05 | 4.48E-04 | HMOX1     | -2.505 | 1.41E-02 | 3.74E-02 |
| HAMP      | -2.513 | 8.42E-03 | 2.46E-02 | HOXB7     | -5.454 | 1.50E-02 | 3.93E-02 |
| HAPLN4    | -3.488 | 2.38E-03 | 9.10E-03 | HPGDS     | -4.282 | 6.79E-05 | 6.46E-04 |
| HAVCR2    | -2.643 | 2.10E-03 | 8.27E-03 | HRCT1     | -3.638 | 7.40E-03 | 2.22E-02 |
| HBB       | -3.429 | 1.37E-02 | 3.66E-02 | HRH1      | -3.249 | 1.82E-05 | 2.64E-04 |
| HBG1      | -2.879 | 1.95E-02 | 4.85E-02 | HS3ST3A1  | -2.141 | 1.46E-02 | 3.83E-02 |
| HBG2      | -3.005 | 1.31E-02 | 3.52E-02 | HS6ST2    | -4.721 | 2.85E-05 | 3.56E-04 |
| HCK       | -2.931 | 2.47E-03 | 9.38E-03 | HSPA6     | -2.572 | 1.17E-02 | 3.21E-02 |
| HCLS1     | -2.491 | 2.33E-05 | 3.08E-04 | HSPB8     | -2.796 | 1.68E-02 | 4.29E-02 |
| HCST      | -2.853 | 1.75E-06 | 6.03E-05 | HTR2A     | -5.626 | 1.79E-04 | 1.29E-03 |
| HDAC9     | -2.206 | 1.99E-04 | 1.39E-03 | HTR7      | -3.376 | 2.20E-04 | 1.50E-03 |
| HDC       | -3.664 | 3.85E-03 | 1.32E-02 | HTRA4     | -2.822 | 7.77E-03 | 2.31E-02 |
| HECW1     | -5.086 | 3.22E-03 | 1.15E-02 | HVCN1     | -2.520 | 2.62E-04 | 1.72E-03 |
| HECW2     | -2.499 | 1.40E-03 | 6.05E-03 | ICOS      | -3.959 | 1.97E-02 | 4.87E-02 |
| HEMGN     | -2.542 | 4.53E-03 | 1.50E-02 | IFI27     | -3.621 | 1.24E-04 | 9.84E-04 |
| HERC5     | -2.106 | 1.69E-04 | 1.23E-03 | IFI30     | -3.083 | 5.21E-06 | 1.20E-04 |
| HERC6     | -2.074 | 2.38E-04 | 1.59E-03 | IFI44L    | -2.121 | 1.70E-03 | 7.01E-03 |
| HGF       | -3.039 | 2.07E-03 | 8.17E-03 | IFITM1    | -2.666 | 1.18E-04 | 9.49E-04 |
| HHEX      | -3.458 | 4.69E-04 | 2.63E-03 | IGFBP3    | -2.144 | 4.95E-06 | 1.16E-04 |
| HHIPL2    | -2.391 | 6.05E-03 | 1.89E-02 | IGFBP4    | -3.729 | 4.66E-05 | 4.97E-04 |
| HIP1      | -2.029 | 7.48E-05 | 6.93E-04 | IGSF10    | -2.691 | 1.38E-03 | 5.97E-03 |
| HIST1H1B  | -3.694 | 6.88E-05 | 6.52E-04 | IGSF21    | -2.853 | 6.84E-03 | 2.09E-02 |
| HIST1H1D  | -2.957 | 1.10E-03 | 5.03E-03 | IGSF5     | -2.288 | 5.54E-04 | 2.99E-03 |
| HIST1H2AG | -3.602 | 1.35E-05 | 2.18E-04 | IGSF6     | -3.816 | 2.64E-04 | 1.72E-03 |
| HIST1H2AH | -3.096 | 1.75E-04 | 1.27E-03 | IKBIP     | -2.171 | 4.21E-08 | 8.35E-06 |
| HIST1H2AI | -3.693 | 2.92E-04 | 1.85E-03 | IKZF1     | -3.429 | 2.31E-03 | 8.89E-03 |
| HIST1H2AJ | -5.085 | 4.10E-07 | 2.61E-05 | IL10RA    | -2.710 | 8.07E-03 | 2.38E-02 |
| HIST1H2AL | -4.026 | 1.76E-06 | 6.03E-05 | IL11      | -2.300 | 7.19E-04 | 3.63E-03 |
| HIST1H2AM | -3.247 | 2.98E-03 | 1.08E-02 | IL12A     | -5.273 | 1.99E-04 | 1.39E-03 |
| HIST1H2BF | -2.235 | 1.85E-02 | 4.65E-02 | IL12RB1   | -2.974 | 1.28E-02 | 3.46E-02 |
| HIST1H2BH | -4.455 | 6.01E-05 | 5.96E-04 | IL13RA2   | -2.597 | 5.01E-04 | 2.77E-03 |

|        |        |          |          |             |        |          |          |
|--------|--------|----------|----------|-------------|--------|----------|----------|
| IL16   | -2.780 | 8.23E-03 | 2.41E-02 | KCNQ3       | -3.347 | 8.26E-03 | 2.42E-02 |
| IL17D  | -2.259 | 1.20E-02 | 3.29E-02 | KCNQ5       | -2.956 | 1.43E-03 | 6.15E-03 |
| IL18   | -2.216 | 6.08E-07 | 3.21E-05 | KCNT2       | -2.915 | 1.27E-07 | 1.45E-05 |
| IL18R1 | -2.767 | 9.34E-03 | 2.68E-02 | KCTD16      | -3.626 | 6.14E-06 | 1.33E-04 |
| IL1B   | -3.907 | 2.13E-04 | 1.47E-03 | KIAA0748    | -3.686 | 1.59E-02 | 4.11E-02 |
| IL1R1  | -3.760 | 6.49E-06 | 1.38E-04 | KIAA0922    | -2.449 | 1.38E-05 | 2.20E-04 |
| IL1RN  | -3.695 | 1.70E-03 | 7.00E-03 | KIAA1274    | -2.296 | 4.21E-04 | 2.43E-03 |
| IL21R  | -3.628 | 2.01E-02 | 4.97E-02 | KIAA1462    | -2.741 | 4.71E-07 | 2.84E-05 |
| IL2RG  | -2.993 | 1.88E-02 | 4.70E-02 | KIAA1644    | -2.994 | 2.89E-03 | 1.06E-02 |
| IL4R   | -2.850 | 5.49E-03 | 1.75E-02 | KIAA1755    | -3.992 | 9.08E-04 | 4.33E-03 |
| ILDR2  | -2.338 | 6.27E-04 | 3.28E-03 | KIF21B      | -2.317 | 3.64E-03 | 1.27E-02 |
| INHBA  | -5.595 | 5.02E-06 | 1.17E-04 | KIF23       | -2.142 | 3.31E-05 | 3.91E-04 |
| INPP5D | -3.030 | 1.07E-06 | 4.46E-05 | KIRREL3     | -2.552 | 1.55E-02 | 4.04E-02 |
| IP6K3  | -2.193 | 5.32E-03 | 1.71E-02 | KLHL4       | -5.021 | 5.86E-05 | 5.85E-04 |
| IQCJ   | -3.748 | 4.05E-03 | 1.38E-02 | KLHL6       | -3.063 | 4.45E-03 | 1.48E-02 |
| IRAK3  | -2.558 | 6.60E-04 | 3.40E-03 | KLK5        | -5.953 | 1.67E-03 | 6.92E-03 |
| IRF4   | -3.203 | 8.23E-03 | 2.41E-02 | KLK6        | -8.495 | 5.11E-07 | 3.01E-05 |
| IRF5   | -2.304 | 5.28E-04 | 2.89E-03 | KLRC4-KLRK1 | -3.244 | 1.41E-02 | 3.73E-02 |
| IRF8   | -3.018 | 3.55E-03 | 1.24E-02 | KLRK1       | -3.274 | 1.48E-02 | 3.87E-02 |
| ISG15  | -2.442 | 1.74E-04 | 1.26E-03 | KMO         | -2.486 | 1.35E-02 | 3.61E-02 |
| ISL1   | -7.209 | 6.11E-03 | 1.91E-02 | KRT1        | -7.432 | 6.51E-04 | 3.37E-03 |
| ISLR   | -4.007 | 4.08E-03 | 1.38E-02 | KRT17       | -2.617 | 4.46E-04 | 2.53E-03 |
| ITGA11 | -5.103 | 2.51E-05 | 3.25E-04 | KRT7        | -2.280 | 1.55E-02 | 4.03E-02 |
| ITGA2  | -2.217 | 2.74E-04 | 1.77E-03 | KYNU        | -3.200 | 4.09E-04 | 2.37E-03 |
| ITGA4  | -2.292 | 2.68E-03 | 1.00E-02 | LAIR1       | -3.021 | 1.88E-04 | 1.33E-03 |
| ITGA9  | -2.612 | 1.15E-06 | 4.62E-05 | LAMA1       | -2.328 | 1.10E-02 | 3.05E-02 |
| ITGAL  | -2.899 | 2.22E-03 | 8.62E-03 | LAMA3       | -2.070 | 1.33E-02 | 3.58E-02 |
| ITGAM  | -2.668 | 1.06E-02 | 2.98E-02 | LAMA4       | -5.617 | 2.94E-07 | 2.21E-05 |
| ITGAX  | -2.667 | 1.87E-02 | 4.68E-02 | LAMP5       | -3.673 | 7.30E-03 | 2.20E-02 |
| ITGB2  | -2.717 | 8.37E-03 | 2.45E-02 | LANCL3      | -2.619 | 6.34E-03 | 1.97E-02 |
| ITGB3  | -3.115 | 2.73E-05 | 3.44E-04 | LAPTM5      | -3.175 | 1.96E-03 | 7.82E-03 |
| ITGB6  | -3.047 | 1.09E-02 | 3.04E-02 | LAT2        | -2.422 | 8.62E-06 | 1.67E-04 |
| ITIH5  | -2.167 | 5.88E-03 | 1.85E-02 | LAYN        | -2.163 | 2.35E-05 | 3.10E-04 |
| JPH3   | -5.937 | 8.48E-05 | 7.51E-04 | LCN2        | -4.825 | 7.28E-03 | 2.20E-02 |
| KAAG1  | -4.099 | 5.25E-03 | 1.69E-02 | LCP1        | -2.632 | 3.76E-05 | 4.26E-04 |
| KAL1   | -2.636 | 4.62E-03 | 1.53E-02 | LCP2        | -3.211 | 2.59E-03 | 9.74E-03 |
| KCNA4  | -3.747 | 7.29E-03 | 2.20E-02 | LEFTY2      | -4.850 | 1.85E-05 | 2.68E-04 |
| KCNAB1 | -2.948 | 5.85E-04 | 3.12E-03 | LFNG        | -2.572 | 7.60E-04 | 3.78E-03 |
| KCNE4  | -3.803 | 6.53E-06 | 1.38E-04 | LGALS9      | -2.418 | 1.89E-03 | 7.60E-03 |
| KCNH1  | -4.297 | 1.44E-03 | 6.20E-03 | LGI2        | -2.694 | 3.98E-03 | 1.36E-02 |
| KCNIP1 | -3.321 | 6.39E-07 | 3.33E-05 | LGSN        | -4.038 | 3.29E-03 | 1.17E-02 |
| KCNJ12 | -3.196 | 8.65E-03 | 2.52E-02 | LIF         | -2.343 | 3.69E-04 | 2.21E-03 |
| KCNJ15 | -2.258 | 2.01E-02 | 4.97E-02 | LIFR        | -3.147 | 4.22E-06 | 1.06E-04 |
| KCNJ16 | -6.056 | 2.64E-05 | 3.36E-04 | LILRA1      | -3.389 | 8.94E-04 | 4.28E-03 |
| KCNJ18 | -3.230 | 9.09E-03 | 2.62E-02 | LILRA2      | -3.040 | 3.97E-03 | 1.35E-02 |
| KCNJ3  | -4.277 | 3.11E-04 | 1.94E-03 | LILRA6      | -3.086 | 4.63E-03 | 1.53E-02 |
| KCNJ8  | -3.843 | 7.71E-04 | 3.82E-03 | LILRB1      | -2.636 | 4.47E-03 | 1.49E-02 |
| KCNK13 | -4.135 | 1.63E-03 | 6.80E-03 | LILRB2      | -2.905 | 2.47E-03 | 9.37E-03 |
| KCNK6  | -2.398 | 7.71E-04 | 3.82E-03 | LILRB3      | -3.241 | 5.44E-03 | 1.74E-02 |
| KCNMA1 | -2.478 | 2.69E-03 | 1.00E-02 | LINC00256A  | -7.581 | 8.93E-05 | 7.78E-04 |
| KCNMB1 | -2.235 | 1.63E-02 | 4.18E-02 | LINC00327   | -3.126 | 6.15E-03 | 1.92E-02 |
| KCNN4  | -2.792 | 1.18E-02 | 3.23E-02 | LINC00340   | -3.539 | 9.22E-06 | 1.72E-04 |

|              |        |          |          |          |        |          |          |
|--------------|--------|----------|----------|----------|--------|----------|----------|
| LINC00475    | -3.704 | 8.64E-05 | 7.61E-04 | LRRRC15  | -3.063 | 5.22E-03 | 1.68E-02 |
| LIPC         | -7.320 | 3.89E-05 | 4.36E-04 | LRRRC17  | -2.049 | 1.54E-05 | 2.38E-04 |
| LIPH         | -3.795 | 2.42E-03 | 9.23E-03 | LRRRC25  | -2.177 | 1.98E-02 | 4.90E-02 |
| LITAF        | -2.211 | 6.82E-06 | 1.43E-04 | LRRRC33  | -2.118 | 1.75E-02 | 4.43E-02 |
| LMO2         | -3.147 | 2.31E-05 | 3.07E-04 | LRRRC4C  | -5.807 | 4.95E-05 | 5.20E-04 |
| LMO4         | -2.164 | 5.64E-06 | 1.26E-04 | LRRK1    | -2.036 | 6.46E-03 | 1.99E-02 |
| LOC100128750 | -3.887 | 4.98E-03 | 1.62E-02 | LRRTM2   | -4.413 | 3.19E-04 | 1.98E-03 |
| LOC100131234 | -3.192 | 5.64E-03 | 1.79E-02 | LSP1     | -2.450 | 7.96E-05 | 7.20E-04 |
| LOC100132735 | -7.304 | 4.51E-04 | 2.56E-03 | LTBP2    | -2.103 | 4.67E-03 | 1.54E-02 |
| LOC100132891 | -5.047 | 6.94E-03 | 2.12E-02 | LURAP1L  | -2.321 | 5.27E-08 | 9.30E-06 |
| LOC100190940 | -4.153 | 7.66E-05 | 7.03E-04 | LY86     | -4.126 | 1.81E-04 | 1.30E-03 |
| LOC100233209 | -3.502 | 5.75E-04 | 3.08E-03 | LY96     | -3.187 | 8.15E-05 | 7.30E-04 |
| LOC100287216 | -3.480 | 1.17E-02 | 3.21E-02 | LYN      | -2.270 | 5.05E-06 | 1.18E-04 |
| LOC100499467 | -3.635 | 7.53E-03 | 2.26E-02 | LYPD1    | -2.398 | 7.28E-05 | 6.80E-04 |
| LOC100505702 | -3.517 | 2.19E-05 | 2.97E-04 | LYPD6B   | -2.362 | 8.12E-04 | 3.97E-03 |
| LOC100505718 | -7.271 | 1.84E-05 | 2.66E-04 | LYZ      | -3.526 | 6.34E-04 | 3.31E-03 |
| LOC100505746 | -2.920 | 8.79E-03 | 2.55E-02 | MAP1B    | -3.128 | 4.39E-07 | 2.70E-05 |
| LOC100505812 | -2.643 | 2.39E-05 | 3.13E-04 | MAPK12   | -3.299 | 3.01E-06 | 8.42E-05 |
| LOC100506385 | -6.354 | 7.98E-06 | 1.58E-04 | MARCH1   | -3.344 | 7.00E-05 | 6.60E-04 |
| LOC100506394 | -2.701 | 3.47E-05 | 4.05E-04 | MARCKS   | -3.029 | 2.96E-04 | 1.87E-03 |
| LOC100507254 | -4.534 | 5.44E-05 | 5.53E-04 | MASP1    | -2.038 | 1.02E-03 | 4.73E-03 |
| LOC100507632 | -4.593 | 1.98E-06 | 6.48E-05 | MATK     | -3.737 | 7.55E-03 | 2.26E-02 |
| LOC148824    | -2.977 | 9.71E-03 | 2.77E-02 | MATN3    | -3.253 | 1.81E-03 | 7.36E-03 |
| LOC152225    | -3.233 | 2.27E-03 | 8.79E-03 | MBOAT1   | -2.451 | 7.49E-05 | 6.94E-04 |
| LOC152742    | -3.703 | 7.95E-04 | 3.91E-03 | MCOLN2   | -3.134 | 1.66E-03 | 6.88E-03 |
| LOC285758    | -3.952 | 3.32E-04 | 2.04E-03 | MCOLN3   | -3.769 | 1.34E-04 | 1.04E-03 |
| LOC375010    | -3.544 | 4.35E-06 | 1.07E-04 | MCTP1    | -4.495 | 5.37E-04 | 2.92E-03 |
| LOC388630    | -4.055 | 1.55E-03 | 6.54E-03 | MCTP2    | -3.810 | 3.09E-06 | 8.51E-05 |
| LOC606724    | -3.212 | 3.40E-03 | 1.20E-02 | MDFI     | -4.373 | 1.25E-05 | 2.08E-04 |
| LOC642366    | -7.270 | 1.94E-02 | 4.83E-02 | MDGA1    | -2.089 | 2.90E-04 | 1.84E-03 |
| LOC643401    | -3.471 | 1.88E-06 | 6.27E-05 | MDM2     | -2.684 | 8.59E-09 | 5.31E-06 |
| LOC643650    | -4.250 | 9.41E-05 | 8.10E-04 | MECOM    | -4.636 | 2.19E-04 | 1.49E-03 |
| LOC645638    | -2.146 | 2.14E-04 | 1.47E-03 | MEF2C    | -3.302 | 3.02E-05 | 3.70E-04 |
| LOC727982    | -9.121 | 2.90E-07 | 2.19E-05 | MEG3     | -4.509 | 6.78E-05 | 6.46E-04 |
| LOC728643    | -4.858 | 1.80E-04 | 1.29E-03 | MEG8     | -4.068 | 2.64E-03 | 9.87E-03 |
| LOC728739    | -5.572 | 7.11E-05 | 6.67E-04 | MEIS2    | -3.416 | 8.75E-05 | 7.68E-04 |
| LOC728875    | -4.077 | 1.75E-02 | 4.44E-02 | MELK     | -2.603 | 5.25E-03 | 1.69E-02 |
| LOC728978    | -6.242 | 1.09E-05 | 1.92E-04 | MEST     | -2.466 | 1.42E-08 | 6.08E-06 |
| LOC80054     | -3.589 | 6.21E-03 | 1.93E-02 | MEX3B    | -2.859 | 8.15E-05 | 7.30E-04 |
| LOC90246     | -3.208 | 2.60E-05 | 3.33E-04 | MFAP2    | -2.230 | 8.91E-06 | 1.69E-04 |
| LOX          | -3.215 | 2.39E-06 | 7.24E-05 | MFAP4    | -2.845 | 2.42E-06 | 7.29E-05 |
| LOXL2        | -2.037 | 3.35E-03 | 1.19E-02 | MFAP5    | -7.926 | 2.75E-07 | 2.15E-05 |
| LOXL4        | -3.034 | 6.09E-04 | 3.21E-03 | MFGE8    | -3.002 | 9.70E-04 | 4.56E-03 |
| LPAR4        | -6.669 | 9.82E-08 | 1.30E-05 | MFNG     | -2.491 | 1.42E-02 | 3.75E-02 |
| LPAR5        | -3.025 | 4.78E-04 | 2.67E-03 | MGAM     | -2.336 | 3.12E-03 | 1.12E-02 |
| LPAR6        | -3.227 | 1.32E-07 | 1.47E-05 | MGC45800 | -3.550 | 1.70E-04 | 1.24E-03 |
| LPCAT2       | -3.219 | 7.05E-05 | 6.62E-04 | MICAL1   | -2.177 | 2.98E-04 | 1.88E-03 |
| LPHN3        | -3.616 | 1.04E-02 | 2.93E-02 | MILR1    | -3.173 | 6.86E-04 | 3.50E-03 |
| LPL          | -4.174 | 5.78E-03 | 1.82E-02 | MIR1245A | -4.951 | 1.23E-02 | 3.35E-02 |
| LRCH2        | -2.047 | 3.93E-03 | 1.34E-02 | MIR143HG | -2.314 | 4.59E-03 | 1.52E-02 |
| LRMP         | -3.077 | 2.09E-04 | 1.44E-03 | MIR21    | -3.563 | 7.46E-06 | 1.50E-04 |
| LRP2         | -5.733 | 5.83E-09 | 4.53E-06 | MIR221   | -4.501 | 1.16E-03 | 5.24E-03 |



|           |        |          |          |         |        |          |          |
|-----------|--------|----------|----------|---------|--------|----------|----------|
| MIR223    | -3.687 | 6.28E-03 | 1.95E-02 | NDST4   | -5.317 | 4.13E-04 | 2.39E-03 |
| MIR335    | -3.037 | 1.33E-04 | 1.04E-03 | NEB     | -2.017 | 1.33E-02 | 3.56E-02 |
| MIR3606   | -2.022 | 9.68E-04 | 4.56E-03 | NEDD4   | -2.232 | 3.46E-07 | 2.38E-05 |
| MIR3676   | -2.277 | 2.63E-03 | 9.85E-03 | NEGR1   | -3.379 | 6.03E-04 | 3.19E-03 |
| MIR433    | -5.546 | 3.70E-04 | 2.21E-03 | NEIL3   | -4.057 | 1.46E-03 | 6.25E-03 |
| MIR548AA1 | -5.294 | 2.47E-04 | 1.64E-03 | NEK10   | -2.521 | 9.79E-04 | 4.60E-03 |
| MIR654    | -6.248 | 5.30E-05 | 5.45E-04 | NETO2   | -4.186 | 1.89E-04 | 1.33E-03 |
| MIR668    | -5.197 | 2.27E-03 | 8.78E-03 | NEURL1B | -3.129 | 4.42E-04 | 2.51E-03 |
| MKI67     | -3.118 | 3.94E-04 | 2.30E-03 | NEXN    | -3.170 | 3.50E-07 | 2.38E-05 |
| MKRN9P    | -3.403 | 1.49E-04 | 1.13E-03 | NFAM1   | -3.186 | 2.42E-03 | 9.22E-03 |
| MKX       | -3.017 | 2.02E-02 | 4.99E-02 | NFATC2  | -2.408 | 2.62E-04 | 1.72E-03 |
| MLF1IP    | -2.205 | 1.26E-05 | 2.08E-04 | NFE2L3  | -3.178 | 8.04E-04 | 3.94E-03 |
| MLKL      | -2.215 | 2.81E-05 | 3.51E-04 | NFKBIZ  | -2.589 | 1.13E-04 | 9.20E-04 |
| MMP2      | -4.282 | 8.97E-06 | 1.69E-04 | NGF     | -2.340 | 1.24E-02 | 3.36E-02 |
| MMP23B    | -3.946 | 1.17E-02 | 3.20E-02 | NHLH2   | -4.531 | 2.89E-04 | 1.83E-03 |
| MNDA      | -4.148 | 1.47E-05 | 2.30E-04 | NID2    | -3.230 | 3.89E-05 | 4.36E-04 |
| MOB3B     | -2.225 | 1.09E-06 | 4.52E-05 | NIPAL4  | -6.199 | 2.49E-04 | 1.65E-03 |
| MOGAT2    | -3.798 | 4.40E-03 | 1.47E-02 | NKAIN2  | -8.222 | 2.43E-06 | 7.31E-05 |
| MPEG1     | -3.060 | 1.35E-03 | 5.89E-03 | NKAIN3  | -6.032 | 2.27E-05 | 3.04E-04 |
| MPPED2    | -3.277 | 2.66E-03 | 9.94E-03 | NKAIN4  | -7.600 | 1.18E-06 | 4.64E-05 |
| MRC1      | -2.435 | 1.01E-02 | 2.86E-02 | NLGN1   | -4.152 | 2.54E-04 | 1.67E-03 |
| MS4A14    | -2.959 | 4.65E-03 | 1.54E-02 | NLRP10  | -3.931 | 1.88E-03 | 7.58E-03 |
| MS4A4A    | -3.509 | 2.94E-04 | 1.86E-03 | NLRP12  | -3.659 | 2.17E-03 | 8.48E-03 |
| MS4A6A    | -3.445 | 4.90E-04 | 2.72E-03 | NNMT    | -3.717 | 7.88E-05 | 7.15E-04 |
| MS4A7     | -3.312 | 1.50E-03 | 6.37E-03 | NOV     | -3.777 | 4.85E-04 | 2.70E-03 |
| MSLN      | -2.681 | 4.61E-03 | 1.53E-02 | NOX4    | -3.284 | 6.67E-04 | 3.43E-03 |
| MSR1      | -3.607 | 3.89E-04 | 2.29E-03 | NPL     | -2.115 | 4.91E-07 | 2.93E-05 |
| MT1E      | -3.047 | 2.08E-05 | 2.89E-04 | NPPB    | -4.704 | 8.71E-03 | 2.53E-02 |
| MT1F      | -2.201 | 5.62E-04 | 3.02E-03 | NPTX1   | -5.494 | 5.15E-04 | 2.83E-03 |
| MT1G      | -2.647 | 1.93E-03 | 7.73E-03 | NR2F1   | -2.327 | 4.63E-04 | 2.61E-03 |
| MT1L      | -4.325 | 1.92E-06 | 6.35E-05 | NR4A2   | -4.498 | 1.94E-02 | 4.81E-02 |
| MT2A      | -3.699 | 1.75E-05 | 2.58E-04 | NR4A3   | -5.017 | 2.31E-03 | 8.91E-03 |
| MUC16     | -4.310 | 4.85E-03 | 1.59E-02 | NRCAM   | -2.186 | 2.04E-03 | 8.06E-03 |
| MUC4      | -4.703 | 3.37E-03 | 1.19E-02 | NRP1    | -2.309 | 4.18E-07 | 2.63E-05 |
| MUC7      | -5.074 | 3.01E-03 | 1.09E-02 | NRP2    | -3.163 | 4.54E-04 | 2.57E-03 |
| MX2       | -3.360 | 4.79E-08 | 9.06E-06 | NTM     | -5.496 | 1.14E-06 | 4.62E-05 |
| MXRA5     | -3.733 | 3.83E-04 | 2.26E-03 | NUDT10  | -2.842 | 4.77E-06 | 1.13E-04 |
| MYBL2     | -3.338 | 5.55E-03 | 1.77E-02 | NUSAP1  | -2.072 | 7.65E-05 | 7.03E-04 |
| MYH2      | -3.663 | 2.80E-03 | 1.03E-02 | NXF3    | -4.883 | 1.28E-03 | 5.63E-03 |
| MYL3      | -3.363 | 1.02E-02 | 2.87E-02 | OAS2    | -2.680 | 1.17E-05 | 1.99E-04 |
| MYLK      | -3.774 | 1.69E-04 | 1.24E-03 | OASL    | -2.083 | 2.77E-03 | 1.03E-02 |
| MYO1F     | -2.870 | 1.87E-03 | 7.56E-03 | OBFC2A  | -2.434 | 2.46E-04 | 1.63E-03 |
| NAPSB     | -2.903 | 6.06E-03 | 1.90E-02 | ODC1    | -2.418 | 7.58E-10 | 1.59E-06 |
| NAV3      | -5.290 | 2.20E-06 | 6.88E-05 | ODZ3    | -2.072 | 4.87E-05 | 5.15E-04 |
| NCAPG     | -2.301 | 2.66E-04 | 1.73E-03 | OGFRL1  | -2.216 | 3.03E-09 | 3.03E-06 |
| NCF1      | -2.536 | 5.98E-03 | 1.88E-02 | OLR1    | -4.182 | 9.03E-04 | 4.31E-03 |
| NCF1B     | -2.683 | 7.48E-03 | 2.24E-02 | OMD     | -4.720 | 3.90E-05 | 4.36E-04 |
| NCF1C     | -2.251 | 1.62E-02 | 4.16E-02 | OPALIN  | -8.746 | 3.83E-03 | 1.32E-02 |
| NCF2      | -3.886 | 5.29E-05 | 5.45E-04 | OR2W3   | -3.333 | 2.44E-03 | 9.27E-03 |
| NCF4      | -3.045 | 4.73E-04 | 2.65E-03 | OR52K2  | -3.660 | 1.04E-02 | 2.91E-02 |
| NCKAP1L   | -3.168 | 1.06E-03 | 4.91E-03 | OSBPL10 | -2.102 | 6.44E-06 | 1.37E-04 |
| NDC80     | -2.740 | 6.10E-03 | 1.90E-02 | OSBPL6  | -2.171 | 1.72E-03 | 7.08E-03 |

|             |        |          |          |          |        |          |          |
|-------------|--------|----------|----------|----------|--------|----------|----------|
| OXGR1       | -3.843 | 9.76E-03 | 2.78E-02 | PLA2G2A  | -4.447 | 8.00E-04 | 3.92E-03 |
| OXTR        | -2.456 | 4.88E-03 | 1.60E-02 | PLA2G7   | -4.777 | 1.72E-02 | 4.38E-02 |
| P2RY12      | -4.114 | 8.57E-05 | 7.56E-04 | PLAC9    | -3.714 | 3.33E-05 | 3.93E-04 |
| P2RY13      | -2.979 | 5.77E-03 | 1.82E-02 | PLAU     | -2.949 | 1.93E-03 | 7.73E-03 |
| P2RY6       | -2.720 | 5.69E-03 | 1.80E-02 | PLAUR    | -2.048 | 7.56E-04 | 3.77E-03 |
| P4HA3       | -2.606 | 9.72E-07 | 4.21E-05 | PLCB2    | -2.855 | 1.97E-03 | 7.84E-03 |
| PABPC4L     | -5.093 | 1.65E-04 | 1.21E-03 | PLCL2    | -2.844 | 2.77E-04 | 1.78E-03 |
| PADI2       | -3.373 | 1.18E-02 | 3.22E-02 | PLCXD2   | -2.332 | 1.32E-05 | 2.16E-04 |
| PAG1        | -2.560 | 1.64E-03 | 6.83E-03 | PLEK     | -3.206 | 4.39E-05 | 4.74E-04 |
| PAH         | -4.990 | 2.12E-07 | 1.89E-05 | PLEKHG7  | -5.318 | 1.63E-03 | 6.80E-03 |
| PAK3        | -3.610 | 3.68E-06 | 9.61E-05 | PLEKHO1  | -2.615 | 5.91E-05 | 5.88E-04 |
| PALM        | -3.408 | 3.48E-07 | 2.38E-05 | PLK2     | -2.275 | 1.36E-03 | 5.90E-03 |
| PALM2-AKAP2 | -2.870 | 8.78E-05 | 7.69E-04 | PLOD2    | -2.031 | 2.74E-04 | 1.77E-03 |
| PALMD       | -5.611 | 8.29E-07 | 3.83E-05 | PLS3     | -4.527 | 1.34E-06 | 5.09E-05 |
| PAPSS2      | -2.984 | 5.96E-04 | 3.16E-03 | PLXNA2   | -2.431 | 5.65E-04 | 3.04E-03 |
| PARM1       | -3.438 | 1.63E-03 | 6.80E-03 | PLXNA4   | -4.408 | 2.45E-05 | 3.19E-04 |
| PARP8       | -2.666 | 3.83E-06 | 9.89E-05 | PMAIP1   | -4.736 | 2.57E-04 | 1.69E-03 |
| PARVG       | -2.763 | 4.77E-03 | 1.57E-02 | PMEPA1   | -3.631 | 7.24E-07 | 3.56E-05 |
| PAX2        | -4.451 | 6.48E-03 | 2.00E-02 | PODN     | -2.382 | 7.11E-03 | 2.16E-02 |
| PCDH10      | -3.456 | 1.82E-02 | 4.59E-02 | POSTN    | -7.673 | 6.53E-06 | 1.38E-04 |
| PCDH11X     | -8.425 | 2.41E-08 | 7.08E-06 | PPAPDC1A | -4.889 | 1.10E-05 | 1.92E-04 |
| PCDH11Y     | -4.411 | 1.78E-05 | 2.60E-04 | PPARG    | -4.783 | 6.81E-04 | 3.48E-03 |
| PCDH9       | -6.143 | 2.73E-06 | 7.94E-05 | PPP1R1C  | -2.482 | 1.12E-05 | 1.95E-04 |
| PCSK5       | -2.357 | 1.75E-03 | 7.17E-03 | PPP1R3C  | -3.061 | 3.37E-05 | 3.95E-04 |
| PCYT1B      | -2.692 | 7.86E-05 | 7.15E-04 | PPP4R4   | -4.306 | 3.75E-10 | 1.31E-06 |
| PDCD1LG2    | -2.936 | 3.76E-03 | 1.30E-02 | PRDM1    | -3.466 | 3.33E-03 | 1.18E-02 |
| PDE11A      | -2.050 | 1.48E-04 | 1.12E-03 | PREX1    | -2.790 | 5.16E-03 | 1.67E-02 |
| PDE1C       | -5.049 | 3.13E-05 | 3.78E-04 | PRKX     | -2.165 | 2.45E-08 | 7.08E-06 |
| PDE3B       | -2.836 | 1.90E-03 | 7.63E-03 | PROS1    | -2.833 | 7.00E-05 | 6.60E-04 |
| PDE5A       | -3.161 | 7.69E-07 | 3.67E-05 | PRSS12   | -3.929 | 2.77E-05 | 3.48E-04 |
| PDGFRA      | -2.377 | 6.26E-06 | 1.35E-04 | PRSS23   | -2.643 | 6.11E-05 | 6.03E-04 |
| PDGFRL      | -2.198 | 8.98E-05 | 7.81E-04 | PSD4     | -2.748 | 1.34E-05 | 2.18E-04 |
| PDLIM3      | -3.217 | 2.19E-03 | 8.53E-03 | PSG5     | -4.558 | 3.63E-03 | 1.26E-02 |
| PDZRN4      | -2.710 | 1.17E-05 | 1.99E-04 | PSTPIP1  | -2.463 | 7.92E-04 | 3.90E-03 |
| PECAM1      | -3.408 | 4.81E-04 | 2.68E-03 | PTAFR    | -3.194 | 1.85E-04 | 1.32E-03 |
| PENK        | -5.525 | 1.40E-06 | 5.22E-05 | PTCHD4   | -4.102 | 1.82E-06 | 6.13E-05 |
| PHACTR1     | -3.005 | 6.20E-03 | 1.93E-02 | PTGDR    | -4.155 | 1.31E-02 | 3.52E-02 |
| PHACTR3     | -3.941 | 6.39E-04 | 3.32E-03 | PTGER2   | -3.377 | 1.05E-03 | 4.85E-03 |
| PI3         | -6.247 | 5.40E-05 | 5.52E-04 | PTGER3   | -3.429 | 1.50E-02 | 3.92E-02 |
| PID1        | -3.669 | 1.60E-03 | 6.70E-03 | PTGER4   | -3.162 | 5.02E-03 | 1.63E-02 |
| PIGR        | -3.362 | 6.70E-03 | 2.06E-02 | PTGIS    | -2.852 | 1.21E-03 | 5.42E-03 |
| PIK3AP1     | -2.279 | 1.52E-04 | 1.14E-03 | PTGS1    | -3.127 | 6.62E-04 | 3.41E-03 |
| PIK3CG      | -3.185 | 1.16E-03 | 5.23E-03 | PTH1R    | -2.586 | 4.96E-03 | 1.62E-02 |
| PIK3R3      | -2.983 | 7.08E-03 | 2.15E-02 | PTHLH    | -3.186 | 1.38E-03 | 5.98E-03 |
| PIK3R5      | -2.200 | 1.95E-03 | 7.78E-03 | PTN      | -3.746 | 1.40E-04 | 1.08E-03 |
| PIPOX       | -2.025 | 2.18E-03 | 8.49E-03 | PTP4A1   | -2.223 | 1.77E-06 | 6.03E-05 |
| PITX3       | -4.866 | 1.35E-02 | 3.61E-02 | PTPLA    | -2.759 | 4.46E-07 | 2.74E-05 |
| PIWIL1      | -4.375 | 3.70E-04 | 2.21E-03 | PTPN7    | -2.960 | 5.13E-03 | 1.66E-02 |
| PKIA        | -4.016 | 1.93E-02 | 4.80E-02 | PTPRC    | -3.419 | 4.97E-04 | 2.75E-03 |
| PKIB        | -2.846 | 4.62E-06 | 1.12E-04 | PTPRG    | -2.715 | 1.47E-04 | 1.11E-03 |
| PKP2        | -2.580 | 9.40E-06 | 1.74E-04 | PVRL4    | -3.785 | 4.62E-03 | 1.53E-02 |
| PLA2G1B     | -4.635 | 3.74E-03 | 1.29E-02 | PXDN     | -2.732 | 3.10E-03 | 1.12E-02 |

|           |        |          |          |           |        |          |          |
|-----------|--------|----------|----------|-----------|--------|----------|----------|
| PYCARD    | -2.927 | 1.89E-07 | 1.80E-05 | S1PR1     | -4.276 | 1.29E-02 | 3.47E-02 |
| PZP       | -2.842 | 9.01E-04 | 4.30E-03 | S1PR4     | -4.019 | 5.64E-03 | 1.79E-02 |
| RAB15     | -2.574 | 1.37E-05 | 2.20E-04 | S1PR5     | -5.895 | 3.55E-05 | 4.11E-04 |
| RAB32     | -2.040 | 4.07E-05 | 4.49E-04 | SAA1      | -3.133 | 2.90E-03 | 1.06E-02 |
| RAB39A    | -3.144 | 2.30E-04 | 1.55E-03 | SALL4     | -3.644 | 2.54E-06 | 7.51E-05 |
| RAB3B     | -5.648 | 8.57E-07 | 3.89E-05 | SAMD11    | -3.151 | 1.69E-04 | 1.24E-03 |
| RAC2      | -2.864 | 1.64E-02 | 4.22E-02 | SAMD3     | -3.400 | 7.48E-03 | 2.24E-02 |
| RAD51AP1  | -2.098 | 1.71E-06 | 5.92E-05 | SAMD5     | -4.903 | 2.25E-07 | 1.94E-05 |
| RAMP1     | -5.771 | 2.11E-06 | 6.71E-05 | SAMD9     | -2.069 | 1.20E-06 | 4.71E-05 |
| RASAL2    | -2.896 | 9.31E-08 | 1.26E-05 | SAMHD1    | -3.092 | 1.41E-05 | 2.24E-04 |
| RASD1     | -6.400 | 1.95E-03 | 7.77E-03 | SAMSN1    | -3.476 | 9.40E-04 | 4.45E-03 |
| RASGEF1A  | -2.290 | 2.30E-04 | 1.55E-03 | SASH3     | -3.123 | 1.80E-03 | 7.33E-03 |
| RASL11B   | -2.918 | 1.26E-05 | 2.08E-04 | SAT1      | -2.088 | 3.54E-07 | 2.38E-05 |
| RASSF5    | -2.259 | 3.13E-03 | 1.12E-02 | SCARA3    | -2.334 | 4.17E-06 | 1.05E-04 |
| RBM24     | -3.802 | 1.46E-04 | 1.11E-03 | SCG2      | -3.518 | 3.63E-04 | 2.18E-03 |
| RBPM5     | -3.005 | 2.92E-04 | 1.85E-03 | SCGB3A1   | -4.130 | 2.67E-03 | 9.97E-03 |
| RCN1      | -2.340 | 5.41E-05 | 5.52E-04 | SCIN      | -2.817 | 1.64E-03 | 6.81E-03 |
| RCSD1     | -2.716 | 4.48E-03 | 1.49E-02 | SCN2A     | -5.509 | 7.83E-04 | 3.86E-03 |
| RFTN1     | -2.338 | 3.27E-05 | 3.88E-04 | SCN4B     | -2.815 | 1.25E-05 | 2.07E-04 |
| RGS10     | -2.175 | 1.31E-04 | 1.02E-03 | SCN5A     | -3.879 | 1.46E-04 | 1.11E-03 |
| RGS18     | -2.967 | 4.84E-03 | 1.59E-02 | SCRG1     | -5.838 | 2.13E-05 | 2.93E-04 |
| RGS2      | -3.281 | 8.26E-03 | 2.42E-02 | SCUBE3    | -3.763 | 7.32E-07 | 3.58E-05 |
| RGS20     | -3.001 | 1.13E-02 | 3.13E-02 | SDC1      | -2.707 | 6.15E-05 | 6.05E-04 |
| RGS4      | -3.847 | 1.14E-05 | 1.97E-04 | SDK1      | -2.345 | 3.91E-03 | 1.34E-02 |
| RHBDL2    | -2.727 | 1.34E-02 | 3.59E-02 | SDPR      | -2.539 | 1.69E-04 | 1.24E-03 |
| RIMS2     | -5.322 | 1.25E-03 | 5.53E-03 | SEL1L2    | -5.374 | 2.21E-05 | 3.00E-04 |
| RNASE2    | -3.560 | 1.19E-03 | 5.34E-03 | SEL1L3    | -4.350 | 1.77E-07 | 1.72E-05 |
| RNASE3    | -3.999 | 2.17E-03 | 8.46E-03 | SELPLG    | -2.998 | 2.31E-04 | 1.56E-03 |
| RNASE6    | -3.110 | 1.73E-03 | 7.13E-03 | SEMA3F    | -2.240 | 3.81E-05 | 4.30E-04 |
| RNASE7    | -4.961 | 3.81E-03 | 1.31E-02 | SEMA7A    | -2.027 | 7.96E-04 | 3.91E-03 |
| RNF152    | -3.027 | 7.97E-04 | 3.91E-03 | SERPINA1  | -3.329 | 1.83E-04 | 1.31E-03 |
| RNF175    | -3.352 | 7.41E-03 | 2.23E-02 | SERPINB11 | -4.564 | 3.87E-03 | 1.33E-02 |
| ROR1      | -2.741 | 2.54E-05 | 3.27E-04 | SERPINE1  | -4.045 | 3.78E-05 | 4.27E-04 |
| ROR2      | -2.579 | 4.09E-03 | 1.38E-02 | SERPINE2  | -2.282 | 5.49E-05 | 5.57E-04 |
| ROS1      | -6.093 | 4.65E-06 | 1.12E-04 | SESN3     | -2.367 | 9.77E-08 | 1.30E-05 |
| RPGRIP1   | -2.179 | 8.83E-04 | 4.24E-03 | SFMBT2    | -2.018 | 2.85E-04 | 1.82E-03 |
| RRAD      | -2.966 | 1.30E-02 | 3.51E-02 | SFTA1P    | -3.845 | 1.12E-02 | 3.09E-02 |
| RSAD2     | -2.654 | 4.13E-04 | 2.39E-03 | SGCA      | -4.210 | 1.78E-02 | 4.50E-02 |
| RSPO1     | -3.922 | 2.04E-03 | 8.08E-03 | SGK223    | -3.052 | 1.54E-06 | 5.59E-05 |
| RSPO3     | -8.213 | 2.41E-06 | 7.28E-05 | SGOL1     | -2.465 | 5.63E-03 | 1.79E-02 |
| RTN1      | -2.664 | 2.77E-04 | 1.78E-03 | SH2D4B    | -3.309 | 1.58E-02 | 4.09E-02 |
| RTP4      | -2.607 | 3.24E-04 | 2.00E-03 | SH3PXD2A  | -2.514 | 1.74E-06 | 5.98E-05 |
| RUNX1     | -3.803 | 1.55E-05 | 2.38E-04 | SH3RF3    | -2.945 | 1.82E-04 | 1.30E-03 |
| RUNX1-IT1 | -4.132 | 4.37E-04 | 2.50E-03 | SIDT1     | -2.433 | 2.01E-02 | 4.97E-02 |
| RYR1      | -2.000 | 5.45E-03 | 1.74E-02 | SIGLEC16  | -3.592 | 8.94E-03 | 2.59E-02 |
| S100A10   | -2.876 | 2.02E-05 | 2.84E-04 | SIGLEC5   | -3.408 | 4.98E-03 | 1.62E-02 |
| S100A11   | -2.654 | 3.08E-05 | 3.75E-04 | SIGLEC7   | -2.987 | 9.77E-03 | 2.78E-02 |
| S100A16   | -2.154 | 3.23E-05 | 3.85E-04 | SIGLEC9   | -2.956 | 1.41E-03 | 6.08E-03 |
| S100A2    | -3.066 | 2.14E-05 | 2.93E-04 | SIM2      | -7.587 | 4.57E-03 | 1.52E-02 |
| S100A8    | -3.416 | 5.68E-03 | 1.80E-02 | SIX4      | -3.229 | 6.90E-06 | 1.44E-04 |
| S100A9    | -3.068 | 9.03E-03 | 2.61E-02 | SKAP2     | -3.193 | 8.04E-07 | 3.78E-05 |
| S100Z     | -5.864 | 1.06E-04 | 8.79E-04 | SLA       | -2.619 | 7.64E-05 | 7.03E-04 |

|             |        |          |          |               |        |          |          |
|-------------|--------|----------|----------|---------------|--------|----------|----------|
| SLAMF8      | -2.983 | 1.28E-02 | 3.44E-02 | SNORD114-19   | -5.967 | 1.07E-04 | 8.85E-04 |
| SLAMF9      | -3.573 | 2.94E-03 | 1.07E-02 | SNORD114-2    | -6.324 | 1.97E-05 | 2.79E-04 |
| SLC11A1     | -2.035 | 7.74E-05 | 7.07E-04 | SNORD114-20   | -4.647 | 1.75E-04 | 1.27E-03 |
| SLC13A4     | -3.109 | 4.97E-03 | 1.62E-02 | SNORD114-23   | -4.931 | 1.01E-02 | 2.86E-02 |
| SLC14A1     | -4.219 | 6.46E-03 | 1.99E-02 | SNORD114-24   | -5.015 | 8.66E-04 | 4.18E-03 |
| SLC16A10    | -4.197 | 4.02E-05 | 4.46E-04 | SNORD114-25   | -5.406 | 1.15E-03 | 5.22E-03 |
| SLC16A9     | -2.083 | 3.70E-05 | 4.22E-04 | SNORD114-28   | -6.969 | 9.00E-05 | 7.82E-04 |
| SLC1A3      | -2.871 | 7.15E-03 | 2.17E-02 | SNORD114-29   | -6.717 | 5.05E-05 | 5.27E-04 |
| SLC1A5      | -2.332 | 4.31E-05 | 4.68E-04 | SNORD114-3    | -3.148 | 1.73E-02 | 4.39E-02 |
| SLC22A3     | -4.608 | 1.29E-03 | 5.66E-03 | SNORD114-4    | -5.752 | 9.62E-05 | 8.21E-04 |
| SLC24A4     | -2.467 | 5.49E-03 | 1.75E-02 | SNORD114-6    | -3.974 | 1.72E-02 | 4.38E-02 |
| SLC26A8     | -3.143 | 1.67E-03 | 6.94E-03 | SNORD114-7    | -5.663 | 1.56E-04 | 1.16E-03 |
| SLC28A2     | -2.562 | 5.61E-03 | 1.78E-02 | SNORD114-8    | -5.115 | 5.07E-03 | 1.64E-02 |
| SLC28A3     | -2.250 | 1.36E-02 | 3.63E-02 | SOX4          | -2.132 | 1.80E-04 | 1.29E-03 |
| SLC2A5      | -2.474 | 2.02E-04 | 1.41E-03 | SOX5          | -5.861 | 3.81E-04 | 2.25E-03 |
| SLC37A2     | -2.408 | 6.69E-05 | 6.39E-04 | SOX6          | -3.984 | 3.18E-08 | 7.77E-06 |
| SLC38A4     | -3.862 | 3.30E-05 | 3.91E-04 | SP140         | -2.261 | 1.29E-03 | 5.66E-03 |
| SLC39A10    | -2.144 | 1.69E-10 | 9.41E-07 | SP6           | -5.906 | 1.07E-05 | 1.89E-04 |
| SLC4A7      | -2.574 | 1.09E-05 | 1.91E-04 | SPATA18       | -3.164 | 8.34E-07 | 3.83E-05 |
| SLC5A12     | -5.445 | 7.74E-03 | 2.30E-02 | SPI1          | -2.640 | 6.25E-04 | 3.28E-03 |
| SLC6A11     | -6.171 | 2.15E-05 | 2.94E-04 | SPN           | -2.595 | 7.67E-03 | 2.28E-02 |
| SLC6A14     | -2.574 | 4.04E-03 | 1.37E-02 | SPP1          | -2.984 | 2.69E-03 | 1.00E-02 |
| SLC6A17     | -3.340 | 5.07E-04 | 2.80E-03 | SPTBN2        | -3.501 | 3.05E-07 | 2.25E-05 |
| SLC6A6      | -2.022 | 5.96E-04 | 3.16E-03 | SRGN          | -3.481 | 5.80E-08 | 9.47E-06 |
| SLC7A2      | -4.219 | 2.41E-06 | 7.28E-05 | ST18          | -4.162 | 1.43E-03 | 6.15E-03 |
| SLC7A7      | -2.554 | 5.71E-06 | 1.27E-04 | ST3GAL6       | -3.810 | 2.55E-04 | 1.68E-03 |
| SLC8A1      | -3.897 | 9.54E-05 | 8.17E-04 | ST6GAL1       | -2.662 | 4.01E-04 | 2.34E-03 |
| SLC9A10     | -3.219 | 2.80E-04 | 1.80E-03 | ST6GALNAC5    | -4.954 | 4.11E-07 | 2.61E-05 |
| SLC9A9      | -3.117 | 1.57E-04 | 1.17E-03 | ST8SIA4       | -3.407 | 4.44E-05 | 4.78E-04 |
| SLCO2B1     | -2.893 | 7.29E-03 | 2.20E-02 | ST8SIA6       | -6.970 | 3.87E-06 | 9.96E-05 |
| SLCO5A1     | -3.949 | 7.13E-04 | 3.60E-03 | STAC          | -6.639 | 3.03E-06 | 8.43E-05 |
| SLFN11      | -2.771 | 6.33E-04 | 3.31E-03 | STAP1         | -4.585 | 7.03E-03 | 2.14E-02 |
| SLFN5       | -2.091 | 6.23E-07 | 3.26E-05 | STC2          | -2.811 | 1.06E-04 | 8.78E-04 |
| SLIT2       | -4.199 | 3.49E-07 | 2.38E-05 | STK17B        | -2.145 | 2.75E-06 | 7.97E-05 |
| SLIT2-IT1   | -3.913 | 5.70E-04 | 3.05E-03 | STK32A        | -3.663 | 1.30E-08 | 5.92E-06 |
| SLITRK4     | -3.429 | 1.47E-05 | 2.30E-04 | STMN1         | -2.254 | 3.12E-11 | 6.55E-07 |
| SMOC2       | -4.211 | 5.00E-03 | 1.63E-02 | STMN2         | -6.120 | 1.22E-05 | 2.04E-04 |
| SNAI2       | -2.733 | 3.05E-06 | 8.46E-05 | STON1         | -3.148 | 6.90E-07 | 3.50E-05 |
| SNAI3       | -2.409 | 4.50E-03 | 1.50E-02 | STON1-GTF2A1L | -2.979 | 3.08E-06 | 8.51E-05 |
| SNAP25      | -4.045 | 2.11E-03 | 8.28E-03 | STRA6         | -3.030 | 1.46E-02 | 3.85E-02 |
| SNORD113-1  | -5.373 | 5.61E-03 | 1.78E-02 | STXBP5L       | -2.384 | 1.47E-02 | 3.87E-02 |
| SNORD113-2  | -5.419 | 8.23E-04 | 4.01E-03 | STXBP6        | -5.092 | 2.05E-05 | 2.86E-04 |
| SNORD113-4  | -5.933 | 1.14E-05 | 1.97E-04 | SUCNR1        | -3.726 | 1.53E-02 | 3.98E-02 |
| SNORD113-9  | -6.005 | 3.41E-03 | 1.20E-02 | SUSD3         | -2.596 | 6.37E-04 | 3.31E-03 |
| SNORD114-1  | -5.676 | 7.57E-05 | 6.98E-04 | SYK           | -2.980 | 2.33E-03 | 8.94E-03 |
| SNORD114-10 | -5.465 | 2.02E-04 | 1.41E-03 | SYNDIG1       | -3.075 | 1.88E-02 | 4.70E-02 |
| SNORD114-11 | -7.031 | 2.35E-04 | 1.58E-03 | SYNPO2        | -3.877 | 2.32E-06 | 7.15E-05 |
| SNORD114-13 | -4.788 | 1.67E-03 | 6.93E-03 | SYT14         | -3.531 | 1.76E-03 | 7.19E-03 |
| SNORD114-14 | -4.515 | 3.74E-04 | 2.22E-03 | SYT17         | -3.243 | 4.71E-04 | 2.64E-03 |
| SNORD114-15 | -6.989 | 2.85E-04 | 1.82E-03 | SYTL2         | -3.034 | 2.36E-08 | 7.08E-06 |
| SNORD114-16 | -6.721 | 6.86E-06 | 1.43E-04 | SYTL5         | -4.234 | 2.93E-03 | 1.07E-02 |
| SNORD114-17 | -6.668 | 1.64E-05 | 2.47E-04 | TAGAP         | -3.041 | 2.80E-05 | 3.50E-04 |

|           |        |          |          |           |        |          |          |
|-----------|--------|----------|----------|-----------|--------|----------|----------|
| TAGLN     | -4.140 | 1.91E-07 | 1.81E-05 | TNFRSF21  | -2.378 | 2.59E-04 | 1.70E-03 |
| TAL1      | -4.127 | 4.70E-03 | 1.55E-02 | TNFSF13B  | -2.809 | 3.20E-06 | 8.73E-05 |
| TBC1D10C  | -3.544 | 3.26E-03 | 1.16E-02 | TNFSF8    | -3.128 | 1.97E-03 | 7.84E-03 |
| TBXAS1    | -2.733 | 4.40E-04 | 2.51E-03 | TNNT2     | -4.249 | 5.25E-08 | 9.30E-06 |
| TCTEX1D1  | -4.549 | 5.87E-03 | 1.85E-02 | TOP2A     | -3.152 | 5.43E-04 | 2.95E-03 |
| TEK       | -5.816 | 2.84E-07 | 2.17E-05 | TPK1      | -2.163 | 5.83E-07 | 3.17E-05 |
| TEX101    | -4.413 | 4.73E-03 | 1.56E-02 | TPM4      | -2.725 | 3.00E-08 | 7.65E-06 |
| TFCP2L1   | -2.144 | 1.75E-05 | 2.58E-04 | TPX2      | -2.256 | 3.25E-03 | 1.16E-02 |
| TFEC      | -2.835 | 4.60E-05 | 4.92E-04 | TRAF3IP3  | -3.252 | 4.34E-03 | 1.46E-02 |
| TFF1      | -3.342 | 9.67E-03 | 2.76E-02 | TRANK1    | -2.167 | 5.59E-06 | 1.26E-04 |
| TFPI      | -3.201 | 1.82E-02 | 4.59E-02 | TREM1     | -5.044 | 1.35E-04 | 1.05E-03 |
| TGFB2     | -2.125 | 8.83E-07 | 3.95E-05 | TREM2     | -3.522 | 2.64E-04 | 1.72E-03 |
| THSD7B    | -4.827 | 9.16E-04 | 4.36E-03 | TREML1    | -3.692 | 1.33E-03 | 5.82E-03 |
| THY1      | -3.546 | 2.69E-04 | 1.74E-03 | TRIB1     | -2.735 | 6.28E-05 | 6.12E-04 |
| TIAM1     | -2.645 | 3.53E-04 | 2.14E-03 | TRIM36    | -2.312 | 2.68E-03 | 1.00E-02 |
| TINAGL1   | -4.543 | 3.09E-05 | 3.75E-04 | TRIM58    | -3.474 | 3.11E-05 | 3.76E-04 |
| TKTL1     | -4.706 | 1.72E-03 | 7.07E-03 | TRIM67    | -4.038 | 1.71E-04 | 1.24E-03 |
| TLE3      | -2.434 | 3.87E-04 | 2.28E-03 | TRPV4     | -2.017 | 3.77E-04 | 2.24E-03 |
| TLL2      | -6.387 | 6.08E-08 | 9.47E-06 | TSHZ3     | -3.155 | 4.23E-05 | 4.62E-04 |
| TLR10     | -2.866 | 1.45E-04 | 1.10E-03 | TSPAN11   | -2.888 | 1.80E-03 | 7.32E-03 |
| TLR4      | -3.567 | 1.14E-05 | 1.97E-04 | TSPAN33   | -2.928 | 5.06E-04 | 2.80E-03 |
| TLR5      | -2.882 | 1.28E-04 | 1.01E-03 | TTC39C    | -2.346 | 1.04E-04 | 8.68E-04 |
| TLR6      | -2.932 | 6.12E-07 | 3.22E-05 | TTC9      | -2.231 | 4.87E-04 | 2.71E-03 |
| TLR7      | -3.966 | 1.29E-04 | 1.01E-03 | TTK       | -2.151 | 7.72E-03 | 2.30E-02 |
| TLR8      | -3.269 | 2.10E-03 | 8.27E-03 | TTPA      | -2.871 | 5.67E-03 | 1.80E-02 |
| TM4SF20   | -7.035 | 8.29E-04 | 4.04E-03 | TUBB2A    | -2.071 | 6.69E-04 | 3.43E-03 |
| TM6SF1    | -3.295 | 4.44E-04 | 2.52E-03 | TUBB2B    | -2.967 | 7.69E-04 | 3.81E-03 |
| TM6SF2    | -2.968 | 2.23E-03 | 8.64E-03 | TUBB3     | -2.216 | 7.44E-03 | 2.23E-02 |
| TMC3      | -3.431 | 7.14E-04 | 3.60E-03 | TUBB6     | -2.802 | 4.69E-06 | 1.12E-04 |
| TMEM119   | -2.777 | 2.34E-03 | 8.97E-03 | TWIST2    | -4.637 | 6.28E-04 | 3.29E-03 |
| TMEM132B  | -4.934 | 1.91E-05 | 2.74E-04 | TXNDC3    | -3.433 | 9.58E-03 | 2.74E-02 |
| TMEM140   | -2.738 | 4.28E-03 | 1.44E-02 | TXNIP     | -3.137 | 8.01E-08 | 1.14E-05 |
| TMEM154   | -2.784 | 8.75E-05 | 7.68E-04 | TYMS      | -3.302 | 9.08E-07 | 4.02E-05 |
| TMEM156   | -3.119 | 5.94E-03 | 1.87E-02 | TYROBP    | -3.633 | 3.71E-04 | 2.22E-03 |
| TMEM200A  | -4.576 | 2.28E-06 | 7.07E-05 | UBASH3B   | -2.339 | 8.60E-05 | 7.59E-04 |
| TMEM236   | -3.221 | 3.09E-03 | 1.11E-02 | UCN2      | -2.646 | 7.09E-03 | 2.15E-02 |
| TMEM27    | -2.040 | 1.18E-03 | 5.30E-03 | UG0898H09 | -4.806 | 3.50E-04 | 2.13E-03 |
| TMEM45A   | -2.218 | 1.66E-07 | 1.66E-05 | UHRF1     | -4.187 | 2.62E-04 | 1.72E-03 |
| TMEM47    | -4.077 | 5.45E-07 | 3.09E-05 | UNC5B     | -2.201 | 3.92E-03 | 1.34E-02 |
| TMEM51    | -2.293 | 1.51E-03 | 6.42E-03 | UNC5C     | -5.303 | 8.68E-04 | 4.18E-03 |
| TMEM54    | -2.515 | 1.17E-05 | 1.99E-04 | UTS2R     | -3.309 | 7.31E-03 | 2.20E-02 |
| TMEM92    | -4.258 | 2.05E-03 | 8.11E-03 | VASH2     | -3.014 | 6.04E-04 | 3.19E-03 |
| TMSB10    | -2.784 | 1.56E-05 | 2.39E-04 | VAV1      | -2.466 | 1.67E-02 | 4.28E-02 |
| TNC       | -3.699 | 2.81E-04 | 1.80E-03 | VCAN      | -5.656 | 4.73E-05 | 5.04E-04 |
| TNFAIP3   | -2.233 | 4.00E-04 | 2.33E-03 | VENTX     | -2.360 | 4.43E-03 | 1.48E-02 |
| TNFAIP8   | -2.811 | 2.89E-06 | 8.22E-05 | VGLL3     | -4.345 | 1.20E-04 | 9.60E-04 |
| TNFAIP8L2 | -3.013 | 1.16E-03 | 5.23E-03 | VIT       | -2.317 | 2.43E-04 | 1.62E-03 |
| TNFAIP8L3 | -3.280 | 1.44E-03 | 6.20E-03 | VMO1      | -2.437 | 9.63E-03 | 2.75E-02 |
| TNFRSF10C | -2.059 | 1.27E-06 | 4.90E-05 | VNN1      | -2.764 | 7.74E-03 | 2.30E-02 |
| TNFRSF11B | -3.396 | 5.56E-03 | 1.77E-02 | VNN2      | -2.792 | 4.09E-03 | 1.39E-02 |
| TNFRSF19  | -3.793 | 5.91E-06 | 1.30E-04 | VSIG4     | -3.462 | 1.04E-04 | 8.71E-04 |
| TNFRSF1B  | -2.546 | 1.21E-02 | 3.31E-02 | VTRNA1-1  | -2.118 | 5.89E-03 | 1.85E-02 |

|          |        |          |          |
|----------|--------|----------|----------|
| VTRNA1-3 | -2.068 | 7.74E-05 | 7.07E-04 |
| WARS     | -2.438 | 4.62E-06 | 1.12E-04 |
| WDFY4    | -3.171 | 3.30E-03 | 1.17E-02 |
| WDR63    | -3.789 | 7.03E-10 | 1.59E-06 |
| WDR69    | -4.111 | 1.48E-04 | 1.12E-03 |
| WDR86    | -3.390 | 6.05E-03 | 1.89E-02 |
| WIF1     | -2.754 | 1.80E-02 | 4.54E-02 |
| WIPF1    | -2.901 | 1.27E-03 | 5.60E-03 |
| WNT11    | -2.303 | 1.51E-03 | 6.42E-03 |
| WNT2     | -5.359 | 5.64E-04 | 3.03E-03 |
| WNT7B    | -4.432 | 6.19E-05 | 6.06E-04 |
| XAF1     | -2.377 | 6.22E-04 | 3.26E-03 |
| XG       | -3.665 | 2.67E-05 | 3.38E-04 |
| XRCC4    | -2.742 | 1.06E-04 | 8.78E-04 |
| ZBED2    | -3.302 | 7.78E-03 | 2.31E-02 |
| ZBP1     | -3.535 | 1.41E-02 | 3.72E-02 |
| ZBTB8A   | -2.254 | 6.87E-04 | 3.50E-03 |
| ZC3H12D  | -2.312 | 8.13E-04 | 3.98E-03 |
| ZEB2     | -3.212 | 6.57E-04 | 3.39E-03 |
| ZEB2-AS1 | -3.280 | 5.72E-03 | 1.81E-02 |
| ZFP36    | -2.007 | 2.63E-03 | 9.85E-03 |
| ZG16B    | -2.703 | 1.34E-02 | 3.59E-02 |
| ZMAT4    | -2.913 | 1.36E-02 | 3.62E-02 |
| ZNF300   | -2.029 | 3.07E-04 | 1.93E-03 |
| ZNF711   | -3.534 | 1.55E-05 | 2.38E-04 |
| ZNF804A  | -3.841 | 1.55E-02 | 4.04E-02 |
