# Supplementary material for: Gene Expression and Missplicing in the Corneal Endothelium of Patients With a TCF4 Trinucleotide Repeat Expansion Without Fuchs' Endothelial Corneal Dystrophy
Source: PubMed Central journal article supplement — Invest Ophthalmol Vis Sci. 2019 Aug;60(10):3636–43. doi: 10.1167/iovs.19-27689 (PMC6716950; doi:10.1167/iovs.19-27689), 2019-08
Supplement: iovs-60-10-11_s03.pdf [file iovs-60-10-11_s03.pdf]

Supplementary Table 3. Uncommon genetic variants identified in RE+/FECD- exomes

| <b>Genes expressed in corneal endothelium</b> |                 |                         |                        |                    |                                                      |                                 |                                       |                 |                            |                       |
|-----------------------------------------------|-----------------|-------------------------|------------------------|--------------------|------------------------------------------------------|---------------------------------|---------------------------------------|-----------------|----------------------------|-----------------------|
| <b>Chromosome</b>                             | <b>Position</b> | <b>Reference Allele</b> | <b>Sample Allele</b>   | <b>Gene Symbol</b> | <b>Protein Variant</b>                               | <b>SIFT Function Prediction</b> | <b>PolyPhen-2 Function Prediction</b> | <b>dbSNP ID</b> | <b>NHLBI ESP Frequency</b> | <b>ExAC Frequency</b> |
| 1                                             | 1597403         | C                       | T                      | SLC35E2B           | p.G346S                                              | Tolerated                       | Possibly Damaging                     | 114859950       |                            | 0.264                 |
| 1                                             | 1606926         | G                       | A                      | SLC35E2B           | p.R188W                                              | Tolerated                       | Benign                                | 776774099       |                            | 0.014                 |
| 1                                             | 117633170       | G                       | A                      | TTF2               | p.R838H                                              | Damaging                        | Probably Damaging                     | 148036415       | 0.5                        | 0.424                 |
| 1                                             | 150525418       | G                       | C                      | ADAMTSL4           | p.Q41H                                               | Tolerated                       | Possibly Damaging                     |                 |                            |                       |
| 1                                             | 150528789       | C                       | T                      | ADAMTSL4           | p.A508V; p.A531V                                     | Tolerated                       | Possibly Damaging                     | 768692911       |                            | 0.002                 |
| 1                                             | 150530958       | C                       | T                      | ADAMTSL4           | p.R759W;<br>p.R821W;<br>p.R798W                      | Tolerated                       | Benign                                | 763279620       |                            | 0.006                 |
| 1                                             | 153747981       | C                       | T                      | SLC27A3            | p.A131V                                              | Tolerated                       |                                       | 145619769       | 0.177                      | 0.17                  |
| 1                                             | 153750665       | G                       | A                      | SLC27A3            | p.R525Q                                              | Damaging                        |                                       | 141932545       | 0.008                      | 0.058                 |
| 1                                             | 161736197       | G                       | T                      | ATF6               | p.S16I                                               | Tolerated                       | Benign                                | 112863172       | 0.392                      | 0.291                 |
| 2                                             | 58386928        |                         | TAAT                   | FANCL;<br>VRK2     | p.T372fs; p.T367fs                                   |                                 |                                       | 759217526       | 0.248                      | 0.288                 |
| 2                                             | 152320877       | A                       | G                      | RIF1               | p.K1615E                                             | Tolerated                       | Benign                                |                 |                            |                       |
| 2                                             | 152321091       | G                       | A                      | RIF1               | p.R1686Q                                             | Tolerated                       | Benign                                | 61748233        | 0.123                      | 0.121                 |
| 2                                             | 159519581       | G                       | A                      | PKP4               | p.R795K;<br>p.R452K; p.R794K                         | Tolerated                       | Benign                                | 139221917       | 0.038                      | 0.108                 |
| 2                                             | 190670540       |                         | A                      | PMS1               | p.L164fs*4                                           |                                 |                                       | 3214425         |                            |                       |
| 3                                             | 40503529        |                         | CTGCTGCTG              | RPL14              | p.A157_A159dup                                       |                                 |                                       |                 |                            |                       |
| 3                                             | 40503529        |                         | CTGCTGCTG<br>CTGCTG    | RPL14              | p.A155_A159dup                                       |                                 |                                       |                 |                            |                       |
| 3                                             | 40503552        |                         | GCTGCTGCT<br>GCTGCTGCT | RPL14              | p.A154_A159dup                                       |                                 |                                       |                 |                            |                       |
| 3                                             | 42251580        |                         | GGAGGA                 | TRAK1              | p.E639_E640dup;<br>p.E623_E624dup;<br>p.E697_E698dup |                                 |                                       |                 |                            |                       |
| 3                                             | 42251609        |                         | AGGAGG                 | TRAK1              | p.E639_E640dup;                                      |                                 |                                       |                 |                            |                       |

|   |           |     |                                                  |                |                                                                                                                  |           |                   |           |       |       |
|---|-----------|-----|--------------------------------------------------|----------------|------------------------------------------------------------------------------------------------------------------|-----------|-------------------|-----------|-------|-------|
|   |           |     |                                                  |                | p.E623_E624dup;<br>p.E697_E698dup                                                                                |           |                   |           |       |       |
| 3 | 51251601  | G   | A                                                | DOCK3          | p.R392Q                                                                                                          | Tolerated | Probably Damaging | 199600118 | 0.075 | 0.058 |
| 3 | 51251618  | A   | G                                                | DOCK3          | p.I398V                                                                                                          | Tolerated | Benign            | 373753412 | 0.008 | 0.001 |
| 3 | 69987114  | G   | A                                                | MITF           | p.D149N; p.D59N;<br>p.D150N;<br>p.D165N;<br>p.D166N;<br>p.D114N                                                  | Tolerated | Benign            | 145387068 | 0.008 | 0.002 |
| 3 | 70014091  | G   | A                                                | MITF           | p.E402K;<br>p.E424K;<br>p.E367K;<br>p.E256K;<br>p.E312K;<br>p.E318K;<br>p.E403K;<br>p.E425K;<br>p.E418K; p.E419K | Tolerated | Possibly Damaging | 149617956 | 0.223 | 0.133 |
| 3 | 100523692 | C   | G                                                | ABI3BP         | p.R1170P;<br>p.R744P;<br>p.R564P;<br>p.R1100P                                                                    | Tolerated | Benign            | 146922324 | 0.083 | 0.159 |
| 3 | 100553585 | G   | A                                                | ABI3BP         | p.R678C;<br>p.R628C;<br>p.R654C                                                                                  |           |                   | 547246874 |       |       |
| 3 | 100583718 | G   | A                                                | ABI3BP         | p.P348L                                                                                                          | Damaging  | Probably Damaging |           |       |       |
| 3 | 113376117 | TGC |                                                  | USF3           | p.Q1478del                                                                                                       |           |                   |           |       |       |
| 3 | 113376119 |     | TGCTGC                                           | USF3           | p.Q1477_Q1478dup                                                                                                 |           |                   |           |       |       |
| 3 | 113376159 | T   | A                                                | USF3           | p.H1457L                                                                                                         | Tolerated | Benign            | 202124437 | 0.039 | 0.06  |
| 4 | 3076603   |     | CAGCAGCAG<br>CAGCAGCAG<br>CAGCAGCAG<br>CAGCAGCAG | HTT-AS;<br>HTT | p.Q29_Q40dup                                                                                                     |           |                   |           |       |       |
| 4 | 3076609   |     | CAGCAG                                           | HTT-AS;<br>HTT | p.Q39_Q40dup                                                                                                     |           |                   |           |       |       |
| 4 | 87638213  | G   | A                                                | PTPN13         | p.S443N                                                                                                          | Tolerated | Benign            | 201331872 | 0.118 | 0.102 |

|   |           |     |   |                        |                                    |           |                   |           |       |       |
|---|-----------|-----|---|------------------------|------------------------------------|-----------|-------------------|-----------|-------|-------|
| 4 | 87684148  | G   | T | PTPN13                 | p.W1255C;<br>p.W1274C;<br>p.W1083C | Tolerated | Possibly Damaging | 201633051 | 0.306 | 0.383 |
| 4 | 190876268 | A   | G | FRG1                   | p.I132V                            | Tolerated | Benign            | 528665769 |       | 0.009 |
| 4 | 190876272 | G   | A | FRG1                   | p.G133E                            | Damaging  | Possibly Damaging | 202104107 |       | 0.01  |
| 4 | 190876287 | G   | A | FRG1                   | p.W138*                            |           |                   | 113079586 |       | 0.006 |
| 4 | 190876307 | G   | A | FRG1                   |                                    |           |                   | 200854715 |       | 0.005 |
| 4 | 190878569 | T   | C | FRG1                   | p.L150S                            | Damaging  | Benign            | 575384276 |       | 0.077 |
| 4 | 190878571 | G   | A | FRG1                   | p.A151T                            | Tolerated | Possibly Damaging | 763602694 |       | 0.073 |
| 4 | 190878596 | G   | A | FRG1                   | p.C159Y                            | Tolerated | Possibly Damaging | 777841400 |       | 0.099 |
| 4 | 190878599 | A   | G | FRG1                   | p.N160S                            | Tolerated | Benign            | 771525586 |       | 0.085 |
| 4 | 190878608 | G   | A | FRG1                   | p.G163E                            | Tolerated | Possibly Damaging | 772516149 |       | 0.087 |
| 4 | 190883051 | G   | A | FRG1                   | p.R235Q                            | Tolerated | Benign            | 1803593   |       | 0.003 |
| 5 | 39153562  | G   | A | FYB1                   | p.P427L; p.P437L                   | Damaging  | Benign            | 199876614 | 0.211 | 0.154 |
| 5 | 56177852  | CAA |   | MAP3K1                 | p.T949del                          |           |                   |           |       |       |
| 5 | 140594467 | G   | A | PCDHB13                | p.V258I                            | Tolerated | Benign            | 17844609  |       | 0.284 |
| 5 | 140594470 | G   | A | PCDHB13                | p.G259S                            | Damaging  | Benign            | 17844610  |       | 0.144 |
| 6 | 12123785  | G   | A | HIVEP1                 | p.D1253N                           | Damaging  | Possibly Damaging | 148091729 | 0.091 | 0.061 |
| 6 | 12163868  | C   | T | HIVEP1                 | p.T2444M                           | Tolerated | Benign            | 2228214   | 0.202 | 0.205 |
| 6 | 26156953  | C   | T | HIST1H1E;<br>HIST1H2BD | p.A112V                            | Tolerated | Benign            | 201133864 | 0.015 | 0.048 |
| 6 | 26157258  | G   | T | HIST1H1E;<br>HIST1H2BD | p.A214S                            | Tolerated | Benign            | 776968459 |       |       |
| 6 | 46593166  | A   | G | CYP39A1                | p.F287S;<br>p.F307S; p.F135S       | Damaging  | Probably Damaging | 137900158 | 0.031 | 0.013 |
| 6 | 46604145  | G   | C | CYP39A1                | p.S238C;<br>p.S218C; p.S66C        | Tolerated | Possibly Damaging | 147866724 | 0.416 | 0.319 |
| 6 | 52317597  | T   | C | EFHC1                  | p.F210L; p.F229L                   | Tolerated | Benign            | 137852776 | 0.331 | 0.358 |
| 6 | 52343926  | G   | T | EFHC1                  | p.R457L; p.R438L                   | Damaging  | Probably Damaging | 369468811 | 0.015 | 0.007 |
| 6 | 106547325 | A   | G | PRDM1                  | p.K54E; p.K188E                    | Damaging  | Probably Damaging | 151324489 | 0.062 | 0.048 |

|    |           |     |         |                   |                                         |            |                   |           |       |       |
|----|-----------|-----|---------|-------------------|-----------------------------------------|------------|-------------------|-----------|-------|-------|
| 6  | 106553383 | C   | T       | PRDM1             | p.L450F; p.L316F                        | Tolerated  | Benign            | 141465160 | 0.208 | 0.421 |
| 6  | 161519354 | CTG |         | MAP3K4            | p.A1195del;<br>p.A1199del;<br>p.A652del |            |                   | 752044838 |       |       |
| 7  | 2296618   | A   | T       | SNX8              | p.F392Y                                 | Tolerated  | Possibly Damaging | 150480674 | 0.208 | 0.154 |
| 7  | 2296622   | A   | T       | SNX8              | p.Y391N                                 | Tolerated  | Benign            | 138169290 | 0.208 | 0.154 |
| 7  | 117188750 | C   | T       | CFTR              | p.S422F                                 |            | Benign            | 201880593 |       | 0.249 |
| 7  | 117188797 | A   | G       | CFTR              | p.T438A                                 |            | Benign            | 201434579 |       | 0.235 |
| 7  | 117188841 | GTT |         | CFTR              | p.L454del                               |            |                   |           |       | 0.017 |
| 7  | 121985635 | A   | G       | CADPS2            | p.L1202S;<br>p.L1161S;<br>p.L1206S      | Damaging   | Benign            |           |       |       |
| 7  | 122114500 | A   | C       | CADPS2            | p.F642V; p.F645V                        | Tolerated  | Benign            | 201536376 | 0.075 | 0.053 |
| 8  | 67341451  | G   | A       | RRS1;<br>RRS1-AS1 | p.E29K                                  | Tolerated  | Benign            | 375178198 | 0.008 | 0.023 |
| 8  | 67342031  | T   | C       | RRS1;<br>RRS1-AS1 | p.M222T                                 | Tolerated  | Benign            | 137894990 | 0.371 | 0.334 |
| 8  | 67342165  | A   | T       | RRS1;<br>RRS1-AS1 | p.N267Y                                 | Damaging   | Benign            | 144551617 | 0.454 | 0.401 |
| 8  | 135602591 | C   | T       | ZFAT              | p.R816K;<br>p.R766K; p.R828K            | Activating | Benign            | 138033806 | 0.375 | 0.32  |
| 8  | 135614553 | G   | C       | ZFAT              | p.S470C;<br>p.S458C; p.S408C            | Damaging   | Probably Damaging | 112892337 | 0.238 | 0.212 |
| 8  | 145738802 | G   | A       | RECQL4            | p.R755W                                 |            | Probably Damaging |           |       |       |
| 8  | 145742480 | G   | A       | RECQL4;<br>LRRC14 | p.P103L                                 |            | Benign            | 199543866 | 0.048 | 0.063 |
| 8  | 145748143 | G   | C       | LRRC14;<br>LRRC24 | p.L420V                                 | Damaging   | Probably Damaging | 376131634 | 0.008 | 0.028 |
| 9  | 139835740 | A   | T       | FBXW5             | p.F474I                                 | Tolerated  | Benign            | 143554180 | 0.062 | 0.087 |
| 9  | 139839860 |     | CATCCCC | FBXW5;<br>C8G     | p.S34fs*12                              |            |                   | 758635843 | 0.048 | 0.009 |
| 10 | 105178221 | A   | G       | PDCD11            | p.K646E                                 | Damaging   | Probably Damaging | 141961630 | 0.008 | 0.008 |
| 10 | 105202091 | G   | T       | PDCD11            | p.R1610L                                | Damaging   | Probably Damaging | 146747336 | 0.085 | 0.176 |
| 10 | 105890027 | C   | T       | CFAP43            | p.R1623Q                                | Damaging   | Probably          | 752348444 |       | 0.002 |

|    |           |           |                  |                            |                                       |           |                      |           |       |       |
|----|-----------|-----------|------------------|----------------------------|---------------------------------------|-----------|----------------------|-----------|-------|-------|
|    |           |           |                  |                            |                                       |           | Damaging             |           |       |       |
| 10 | 105906085 | C         | T                | CFAP43                     | p.R1264Q                              | Tolerated | Benign               | 754109266 |       | 0.002 |
| 11 | 5624917   | C         | G                | TRIM6;<br>TRIM6-<br>TRIM34 | p.H125Q;<br>p.H153Q                   | Damaging  | Probably<br>Damaging |           |       |       |
| 11 | 5626614   | G         | C                | TRIM6;<br>TRIM6-<br>TRIM34 | p.Q189H; p.Q14H;<br>p.Q217H           | Tolerated | Benign               | 61758096  | 0.277 | 0.248 |
| 11 | 34988219  | C         | T                | PDHX                       | p.T210M;<br>p.T225M                   | Tolerated | Benign               | 148645836 | 0.054 | 0.068 |
| 11 | 34988294  | C         | T                | PDHX                       | p.T250I; p.T235I                      | Tolerated | Benign               | 146876119 | 0.031 | 0.067 |
| 11 | 66454564  | G         | A                | SPTBN2                     | p.A2266V                              |           | Benign               | 145891813 | 0.092 | 0.102 |
| 11 | 66475184  | C         | T                | SPTBN2                     | p.A486T                               |           | Possibly<br>Damaging | 143155918 | 0.062 | 0.066 |
| 11 | 66512290  |           | GGCGGCGGC<br>GGC | C11orf80                   | p.A31_A34dup                          |           |                      |           |       | 0.158 |
| 11 | 95825378  | TGCTGCTGC |                  | MAML2                      | p.Q619_Q621del                        |           |                      |           |       |       |
| 11 | 110007898 | C         | G                | ZC3H12C                    | p.Q178E                               | Tolerated | Benign               |           |       |       |
| 11 | 110035132 | G         | A                | ZC3H12C                    | p.R441Q                               | Damaging  | Probably<br>Damaging | 147027799 |       | 0.002 |
| 12 | 6777073   | TGC       |                  | ZNF384                     | p.Q516del;<br>p.Q455del;<br>p.Q400del |           |                      | 747471532 |       |       |
| 12 | 108686292 | G         | T                | CMKLR1                     | p.H148N;<br>p.H150N                   | Damaging  | Possibly<br>Damaging |           |       |       |
| 12 | 108686555 | A         | C                | CMKLR1                     | p.I62S; p.I60S                        | Damaging  | Probably<br>Damaging | 141421422 | 0.475 | 0.361 |
| 12 | 121678328 |           | TTT              | CAMKK2                     | p.K538dup                             |           |                      | 869098373 |       |       |
| 12 | 121678329 |           | TTT              | CAMKK2                     | p.K538dup                             |           |                      |           |       |       |
| 12 | 133219531 | C         | T                | POLE                       | p.G1535S                              | Tolerated | Benign               | 138564205 | 0.008 | 0.007 |
| 12 | 133263886 | C         | G                | POLE;<br>PXMP2             | p.G6R                                 | Tolerated | Benign               | 202220778 | 0.161 | 0.195 |
| 13 | 78146303  | C         | T                | SCEL                       | p.S175L                               | Tolerated | Benign               | 141416270 | 0.284 | 0.231 |
| 14 | 23517386  | G         | A                | CDH24                      | p.P717S; p.P755S                      | Tolerated | Possibly<br>Damaging | 199930802 |       | 0.442 |
| 14 | 23522921  | C         | T                | CDH24                      | p.R337H                               | Tolerated | Probably<br>Damaging | 370840001 |       | 0.006 |
| 14 | 68215328  | A         | T                | ZFYVE26                    | p.L2482Q                              | Damaging  | Probably             |           |       |       |

|    |           |        |   |                      |                                                                                                               |            |                   |           |       |       |
|----|-----------|--------|---|----------------------|---------------------------------------------------------------------------------------------------------------|------------|-------------------|-----------|-------|-------|
|    |           |        |   |                      |                                                                                                               |            | Damaging          |           |       |       |
| 14 | 68274558  | C      | T | ZFYVE26              | p.R148H                                                                                                       |            | Benign            | 144919978 | 0.008 | 0.011 |
| 15 | 50154563  | C      | T | ATP8B4               | p.R1059Q                                                                                                      | Tolerated  | Benign            | 146911077 | 0.239 | 0.229 |
| 15 | 50254207  | A      | C | ATP8B4               | p.H418Q                                                                                                       | Tolerated  | Benign            | 143688108 | 0.008 | 0.001 |
| 15 | 74637567  | T      | C | CYP11A1              | p.K148R                                                                                                       | Tolerated  | Benign            |           |       |       |
| 15 | 74659692  | C      | T | CYP11A1              | p.V79I                                                                                                        | Tolerated  | Benign            | 143655263 | 0.454 | 0.255 |
| 15 | 100252713 | CAGCAG |   | MEF2A                | p.Q419_Q420del;<br>p.Q427_Q428del;<br>p.Q351_Q352del;<br>p.Q421_Q422del;<br>p.Q425_Q426del;<br>p.Q359_Q360del |            |                   |           |       |       |
| 15 | 100252716 | CAGCAG |   | MEF2A                | p.Q419_Q420del;<br>p.Q427_Q428del;<br>p.Q351_Q352del;<br>p.Q421_Q422del;<br>p.Q425_Q426del;<br>p.Q359_Q360del |            |                   |           |       |       |
| 15 | 100252719 | CAG    |   | MEF2A                | p.Q426del;<br>p.Q428del;<br>p.Q352del;<br>p.Q360del;<br>p.Q422del;<br>p.Q420del                               |            |                   |           |       |       |
| 17 | 17718592  | C      | T | SREBF1               | p.R788Q;<br>p.R842Q;<br>p.R812Q                                                                               | Damaging   | Benign            | 141489278 | 0.2   | 0.315 |
| 17 | 17723595  | G      | A | SREBF1               | p.P111L; p.P141L;<br>p.P87L                                                                                   | Damaging   | Benign            | 115855236 | 0.069 | 0.072 |
| 17 | 43315961  | C      | G | FMNL1                | p.L309V                                                                                                       |            | Probably Damaging | 929854823 |       |       |
| 17 | 43319458  | GCC    |   | FMNL1                | p.P612del                                                                                                     |            |                   |           |       |       |
| 17 | 71228379  | G      | C | FAM104A;<br>C17orf80 | p.P23A                                                                                                        | Tolerated  | Benign            | 180917408 | 0.436 | 0.395 |
| 17 | 71228442  | C      | T | FAM104A;<br>C17orf80 | p.G2R                                                                                                         | Damaging   | Probably Damaging | 544578624 |       | 0.019 |
| 18 | 65178507  | T      | C | DSEL                 | p.I1123M                                                                                                      | Tolerated  |                   | 72954698  | 0.1   | 0.08  |
| 18 | 65180987  | C      | T | DSEL                 | p.V297I                                                                                                       | Activating |                   | 150905757 | 0.123 | 0.084 |

|    |          |        |      |                          |                                         |            |                   |           |       |       |
|----|----------|--------|------|--------------------------|-----------------------------------------|------------|-------------------|-----------|-------|-------|
| 19 | 2114127  | CTTCTC |      | AP3D1                    | p.E865_K866del                          |            |                   | 756601658 | 0.236 | 0.186 |
| 19 | 2115584  | T      | C    | AP3D1                    | p.H701R                                 | Tolerated  | Possibly Damaging | 774521539 |       | 0.003 |
| 19 | 11552120 | G      | A    | PRKCSH                   | p.R139H                                 | Tolerated  | Benign            | 139991238 | 0.161 | 0.163 |
| 19 | 11558344 | GAG    |      | PRKCSH                   | p.E325del                               |            |                   |           |       |       |
| 19 | 42827940 | C      | T    | MEGF8;<br>TMEM145        | p.S467F                                 |            | Benign            | 141686253 | 0.161 | 0.27  |
| 19 | 42880167 | G      | A    | MEGF8                    | p.R2593Q;<br>p.R2526Q                   | Damaging   | Probably Damaging | 371459258 | 0.008 | 0.003 |
| 19 | 58578228 | G      | T    | ZNF135                   | p.G150C;<br>p.G138C; p.G84C;<br>p.G126C | Tolerated  | Benign            | 150171641 | 0.092 | 0.065 |
| 21 | 40795408 | C      | T    | WRB-<br>SH3BGR;<br>LCA5L | p.E111K                                 | Tolerated  | Possibly Damaging | 147171239 | 0.188 | 0.127 |
| 22 | 23653975 |        | CCGG | BCR                      | p.V1050fs*17;<br>p.V1094fs*17           |            |                   | 372013175 |       |       |
| 22 | 25753349 | C      | T    | LRP5L                    | p.R104H                                 | Tolerated  | Probably Damaging | 139077409 | 0.085 | 0.105 |
| 22 | 25755942 | C      | G    | LRP5L                    | p.A40P                                  | Damaging   | Probably Damaging | 116871327 | 0.162 | 0.095 |
| X  | 2833605  | C      | T    | ARSD                     | p.W331*                                 |            |                   | 111939179 |       | 0.014 |
| X  | 2835989  | A      | C    | ARSD                     | p.F240C                                 | Tolerated  | Benign            | 143238998 |       | 0.105 |
| X  | 2835995  | C      | A    | ARSD                     | p.C238F                                 | Activating | Benign            | 150899882 |       | 0.118 |

### Genes not Expressed in corneal endothelium

| Chromosome | Position | Reference Allele                  | Sample Allele | Gene Symbol                | Protein Variant | SIFT Function Prediction | PolyPhen-2 Function Prediction | dbSNP ID  | NHLBI ESP Frequency | ExAC Frequency |
|------------|----------|-----------------------------------|---------------|----------------------------|-----------------|--------------------------|--------------------------------|-----------|---------------------|----------------|
| 1          | 17085590 | GCGCTG                            |               | MST1L;<br>LOC102724<br>562 | p.Q376_R377del  |                          |                                | 371449598 |                     | 0.278          |
| 1          | 17085592 | G                                 | A             | MST1L;<br>LOC102724<br>562 | p.R377C         |                          |                                | 756977732 |                     | 0.072          |
| 1          | 47904075 | GCGGCGGC<br>CGCAGCGG<br>GGAGCCCCG |               | FOXD2                      | p.A93_A104del   |                          |                                |           |                     |                |

|   |           |                  |        |                  |                      |           |                   |           |       |       |
|---|-----------|------------------|--------|------------------|----------------------|-----------|-------------------|-----------|-------|-------|
|   |           | GGGCCAGG<br>CGCC |        |                  |                      |           |                   |           |       |       |
| 1 | 47905161  | T                | A      | FOXD2            | p.L452M              | Damaging  | Possibly Damaging | 61751017  | 0.174 | 0.118 |
| 1 | 152080352 | G                | T      | TCHH             | p.Q1781K             | Tolerated | Benign            | 770476948 |       | 0.002 |
| 1 | 152083372 | T                | C      | TCHH             | p.E774G              | Damaging  | Possibly Damaging | 201873363 |       |       |
| 1 | 152083375 | G                | C      | TCHH             | p.A773G              | Tolerated | Benign            | 200287676 |       | 0.009 |
| 1 | 160846458 | C                | G      | ITLN1            | p.R313P              | Damaging  | Probably Damaging | 8144      | 0.408 | 0.39  |
| 1 | 168683471 | G                | A      | DPT              | p.P140L              | Damaging  | Possibly Damaging | 78032017  | 0.108 | 0.143 |
| 1 | 168698208 | A                | T      | DPT              | p.S69T               | Damaging  | Possibly Damaging | 143980534 | 0.223 | 0.195 |
| 2 | 28752614  | C                | G      | PLB1             | p.Q146E              | Tolerated | Benign            | 141605399 | 0.062 | 0.017 |
| 2 | 28761981  | G                | A      | PLB1             | p.V212I; p.V223I     | Damaging  | Probably Damaging | 6753929   |       | 0.048 |
| 2 | 241696844 | TCC              |        | KIF1A            | p.E917del            |           |                   |           |       |       |
| 2 | 241696871 | TCC              |        | KIF1A            | p.E917del            |           |                   |           |       |       |
| 3 | 39225650  | C                | T      | XIRP1            | p.G1763R;<br>p.G446R | Tolerated | Benign            | 200656152 | 0.008 | 0.008 |
| 3 | 39227089  | G                | T      | XIRP1            | p.A1283D             | Tolerated | Benign            | 773527256 |       | 0.002 |
| 3 | 121341019 | A                | T      | FBXO40           | p.K248I              | Tolerated | Benign            | 142436040 | 0.292 | 0.476 |
| 3 | 121341882 | T                | C      | FBXO40           | p.Y536H              | Tolerated | Probably Damaging | 781782231 |       | 0.001 |
| 4 | 265024    | C                | T      | ZNF732           | p.R541H              | Tolerated | Benign            | 200663767 | 0.131 | 0.14  |
| 4 | 265955    | T                | C      | ZNF732           | p.I231V              | Tolerated | Benign            | 144919218 | 0.153 | 0.162 |
| 4 | 100515934 | T                | C      | MTTP             | p.M295T;<br>p.M268T  | Tolerated | Benign            | 146513720 | 0.008 | 0.006 |
| 4 | 100542308 | G                | C      | MTTP             | p.L838F; p.L811F     | Tolerated | Benign            | 144590904 | 0.115 | 0.13  |
| 5 | 121515248 | A                | G      | LOC100505<br>841 | p.T13A               |           |                   | 184376878 |       | 0.323 |
| 5 | 121515251 | A                | G      | LOC100505<br>841 | p.M14V               |           |                   |           |       |       |
| 5 | 145317769 | C                | A      | SH3RF2           | p.T93K               |           | Benign            | 760499672 |       | 0.002 |
| 5 | 145379844 | G                | A      | SH3RF2           | p.R201Q              |           | Possibly Damaging | 35453884  | 0.323 | 0.231 |
| 6 | 1390276   |                  | CCGCCG | FOXF2            | p.A40_A41dup         |           |                   |           |       | 0.072 |



|    |           |                        |    |                                       |                                             |           |                   |           |       |       |
|----|-----------|------------------------|----|---------------------------------------|---------------------------------------------|-----------|-------------------|-----------|-------|-------|
| 6  | 1390277   | CCGCCG                 |    | FOXF2                                 | p.A40_A41del                                |           |                   | 777365162 |       | 0.09  |
| 7  | 15725801  | TGG                    |    | MEOX2                                 | p.H80del                                    |           |                   | 750338773 |       |       |
| 8  | 144511957 | TGG                    |    | MAFA                                  | p.H208del                                   |           |                   | 765697134 |       |       |
| 8  | 144511957 | TGGTGG                 |    | MAFA                                  | p.H207_H208del                              |           |                   |           |       |       |
| 8  | 144511960 | TGG                    |    | MAFA                                  | p.H208del                                   |           |                   |           |       |       |
| 9  | 33797828  | C                      | T  | PRSS3                                 | p.R68C; p.R82C;<br>p.R125C; p.R61C          |           | Possibly Damaging | 143209949 |       | 0.071 |
| 9  | 33797891  | A                      | T  | PRSS3                                 | p.N89Y; p.N82Y;<br>p.N146Y; p.N103Y         |           | Benign            | 567341610 |       | 0.009 |
| 9  | 33797898  | C                      | T  | PRSS3                                 | p.A105V; p.A84V;<br>p.A91V; p.A148V         |           | Benign            | 751456445 |       | 0.009 |
| 9  | 33798504  | A                      | C  | PRSS3                                 | p.K152Q;<br>p.K159Q;<br>p.K173Q;<br>p.K216Q |           | Benign            | 763882223 |       | 0.037 |
| 11 | 48387918  | T                      | A  | OR4C5                                 | p.I34F                                      | Tolerated |                   |           |       |       |
| 11 | 48387919  | G                      |    | OR4C5                                 | p.F33fs*6                                   |           |                   |           |       |       |
| 11 | 48387947  |                        | TA | OR4C5                                 | p.F24fs*5                                   |           |                   |           |       |       |
| 12 | 1902879   | G                      | A  | CACNA2D4                              | p.P1119L                                    | Tolerated | Benign            | 145150489 | 0.191 | 0.18  |
| 12 | 11183720  | T                      | A  | PRH1-<br>TAS2R31;<br>PRH1-<br>TAS2R14 | p.N72I                                      | Tolerated | Benign            |           |       |       |
| 12 | 11214025  | A                      | T  | PRH1-<br>TAS2R46;<br>PRH1-<br>TAS2R14 | p.F290Y                                     | Tolerated | Benign            | 372278369 |       | 0.009 |
| 12 | 11243936  | C                      | G  | PRH1-<br>TAS2R43;<br>PRH1-<br>TAS2R14 | p.R298T                                     | Tolerated | Possibly Damaging | 11537119  |       | 0.223 |
| 12 | 96377687  | A                      | G  | HAL                                   |                                             |           |                   | 141634423 | 0.046 | 0.023 |
| 12 | 96388605  | T                      | C  | HAL                                   |                                             |           |                   | 140799551 | 0.008 | 0.015 |
| 12 | 96389455  | CTCGTTGTT              |    | HAL                                   | p.N76_E78del                                |           |                   | 745343950 | 0.104 | 0.001 |
| 13 | 25671700  | T                      | C  | PABPC3                                | p.V455A                                     | Tolerated | Benign            | 201952806 |       | 0.016 |
| 16 | 89017420  | CCTGGACCG<br>GCACCGGCA |    | CBFA2T3;<br>LOC100129                 | p.P323_G389del                              |           |                   |           |       | 0.012 |

|    |           |                                                                                                                                                                                                                                                                     |   |                              |            |            |                      |           |       |       |
|----|-----------|---------------------------------------------------------------------------------------------------------------------------------------------------------------------------------------------------------------------------------------------------------------------|---|------------------------------|------------|------------|----------------------|-----------|-------|-------|
|    |           | CAGAGGGTC<br>AGAGTGTG<br>GCACCTGTC<br>TTCCGGATC<br>TGTTACCC<br>CTCCCCTGG<br>ACCGGCACC<br>GCCACAGAG<br>GGTCAGAGT<br>GTTGGCACC<br>TGTCTTCCG<br>GATCTGTTC<br>ACCCCTCCC<br>CTGGATCGG<br>CACCGGCAC<br>AGAGGGTCA<br>GAGTGTGG<br>CACCTGTCT<br>TCCGGATCT<br>GTTACCCG<br>TCC |   | 697                          |            |            |                      |           |       |       |
| 16 | 89017620  | C                                                                                                                                                                                                                                                                   | G | CBFA2T3;<br>LOC100129<br>697 | p.P365R    |            |                      | 71395352  |       | 0.027 |
| 18 | 29046607  | T                                                                                                                                                                                                                                                                   | G | DSG3                         | p.V509G    | Tolerated  | Possibly<br>Damaging | 149262687 | 0.377 | 0.268 |
| 20 | 42969950  | G                                                                                                                                                                                                                                                                   |   | R3HDML                       | p.G126fs*6 |            |                      | 567545745 | 0.216 | 0.195 |
| 20 | 42973972  | A                                                                                                                                                                                                                                                                   | G | R3HDML                       | p.N195D    | Tolerated  | Benign               | 144380945 | 0.431 | 0.379 |
| X  | 37028209  | G                                                                                                                                                                                                                                                                   | A | FAM47C                       | p.D576N    | Tolerated  | Benign               | 782543670 |       | 0.044 |
| X  | 37028623  | C                                                                                                                                                                                                                                                                   | A | FAM47C                       | p.L714I    | Tolerated  | Probably<br>Damaging | 201919807 | 0.028 | 0.014 |
| X  | 151869833 | G                                                                                                                                                                                                                                                                   | T | MAGEA3;<br>MAGEA6            | p.V175L    | Tolerated  | Benign               | 146486229 | 0.18  | 0.164 |
| X  | 151935240 | C                                                                                                                                                                                                                                                                   | A | MAGEA3;<br>MAGEA6            | p.L309F    | Damaging   | Benign               | 61750034  |       | 0.441 |
| X  | 151935244 | A                                                                                                                                                                                                                                                                   | G | MAGEA3<br>MAGEA6;            | p.V308A    | Activating | Benign               | 35780974  | 0.038 | 0.457 |
| M  | 5460      | G                                                                                                                                                                                                                                                                   | A | MT-ND2                       | p.A331T    |            |                      | 3021088   |       |       |
